# Supplementary material for: RAS–p110α signalling in macrophages is required for effective inflammatory response and resolution of inflammation
Source: eLife journal article supplement (doi:10.7554/elife.94590), 2024-04-12
Supplement: fig1-figsupp1-data1 [file elife-94590-fig1-figsupp1-data1-v1.zip]

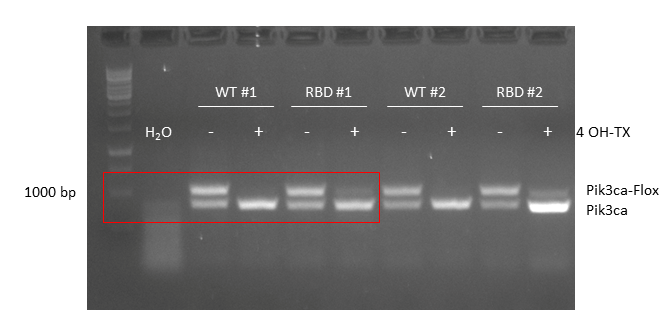


Figure 1-figure supplement 1B, source data 1: Original genotyping gel corresponding to Figure 1-figure supplement 1B. Red square indicates the samples that are shown in Figure 1-figure supplement 1B.
