# Supplementary material for: RAS–p110α signalling in macrophages is required for effective inflammatory response and resolution of inflammation
Source: eLife. 2025 Apr 24;13:RP94590. doi: 10.7554/eLife.94590 (PMC12021417; doi:10.7554/eLife.94590)
Supplement: Supplementary file 1. [file elife-94590-supp1.xlsx]

## Sheet: (1) R v W_peptides
db.ID	logFC	AveExpr	t	P.Value	adj.P.Val	B	acc_no	protein	Peptide	pep_mod
p00979	-2.62309	74.0328	-2.39545	0.0251861	0.361932	-3.64273	1433E	14-3-3 protein epsilon OS=Mus musculus GN=Ywhae PE=1 SV=1	EAAENSLVAYK
p00568	-3.80235	87.7169	-2.81089	0.0120947	0.361932	-3.48842	1433F	14-3-3 protein eta OS=Mus musculus GN=Ywhah PE=1 SV=2	AVTELNEPLSNEDR
p04399	-4.61501	105.358	-2.21317	0.0418995	0.361932	-4.07972	1433S	14-3-3 protein sigma OS=Mus musculus GN=Sfn PE=1 SV=2	NLLSVAYK
p02233	-4.77874	49.5456	-2.68071	0.0158765	0.361932	-3.52406	ACTBL	Beta-actin-like protein 2 OS=Mus musculus GN=Actbl2 PE=1 SV=1	HQGVMVGMGQK
p00304	-6.58145	89.033	-3.51125	0.00318869	0.361932	-3.0522	AK1A1	Alcohol dehydrogenase [NADP(+)] OS=Mus musculus GN=Akr1a1 PE=1 SV=3	ALEVLVAK
p04738	-5.52762	85.9857	-2.79612	0.013658	0.361932	-3.78387	ALDOA	Fructose-bisphosphate aldolase A OS=Mus musculus GN=Aldoa PE=1 SV=2	QLLLTADDR
p02412	-6.47337	168.832	-2.34654	0.0332396	0.361932	-4.01746	ALDOA	Fructose-bisphosphate aldolase A OS=Mus musculus GN=Aldoa PE=1 SV=2	IGEHTPSALAIMENANVLAR	Oxidation (M)
p01918	-4.06699	89.0027	-2.26262	0.0390805	0.361932	-4.06105	ALDOA	Fructose-bisphosphate aldolase A OS=Mus musculus GN=Aldoa PE=1 SV=2	GILAADESTGSIAK
p00055	-4.37786	92.1191	-2.17614	0.0473418	0.361932	-3.97155	ALDOA	Fructose-bisphosphate aldolase A OS=Mus musculus GN=Aldoa PE=1 SV=2	ADDGRPFPQVIK
p05369	-3.25918	50.9112	-2.53517	0.0298989	0.361932	-3.76981	ALDR	Aldose reductase OS=Mus musculus GN=Akr1b1 PE=1 SV=3	SPPGQVTEAVK
p03031	-8.63248	156.829	-2.66971	0.045628	0.361932	-4.36286	AN32B	Acidic leucine-rich nuclear phosphoprotein 32 family member B OS=Mus musculus GN=Anp32b PE=1 SV=1	LAEELPSLTHLNLSGNNLK
p03304	-2.90868	87.2331	-2.39517	0.0313119	0.361932	-3.69896	APOE	Apolipoprotein E OS=Mus musculus GN=Apoe PE=1 SV=2	LGADMEDLR
p02551	-5.45667	120.569	-2.55781	0.0311597	0.361932	-3.93028	ARF4	ADP-ribosylation factor 4 OS=Mus musculus GN=Arf4 PE=1 SV=2	ILMVGLDAAGK
p04971	-5.56573	40.9511	-3.21875	0.00680207	0.361932	-3.17325	ARP2	Actin-related protein 2 OS=Mus musculus GN=Actr2 PE=1 SV=1	RLDIAGR
p06167	-3.92057	56.1917	-2.42426	0.030838	0.361932	-3.82525	ARP2	Actin-related protein 2 OS=Mus musculus GN=Actr2 PE=1 SV=1	VGNIEIK
p02747	-4.41613	111.623	-2.45985	0.0319373	0.361932	-3.95951	ARPC4	Actin-related protein 2/3 complex subunit 4 OS=Mus musculus GN=Arpc4 PE=1 SV=3	IVAEEFLK
p02534	-5.50174	91.7803	-2.93345	0.00933927	0.361932	-3.54571	BGH3	Transforming growth factor-beta-induced protein ig-h3 OS=Mus musculus GN=Tgfbi PE=1 SV=1	ILGDPEALR
p00061	-5.1444	72.2161	-2.3897	0.0488845	0.361932	-4.0046	BGH3	Transforming growth factor-beta-induced protein ig-h3 OS=Mus musculus GN=Tgfbi PE=1 SV=1	ADHHATNGVVHLIDK
p02283	-8.23169	101.752	-3.97429	0.00188586	0.361932	-3.36503	BLVRB	Flavin reductase (NADPH) OS=Mus musculus GN=Blvrb PE=1 SV=3	IAIFGATGR
p04893	-3.7689	72.8101	-2.14293	0.0453785	0.361932	-3.89958	C1QC	Complement C1q subcomponent subunit C OS=Mus musculus GN=C1qc PE=1 SV=2	QVSSGGVLLR
p00699	-3.29594	101.499	-2.36434	0.031162	0.361932	-3.94714	CALM	Calmodulin OS=Mus musculus GN=Calm1 PE=1 SV=2	DGNGYISAAELR
p05860	-3.7292	107.466	-2.15842	0.0447565	0.361932	-3.94501	CATD	Cathepsin D OS=Mus musculus GN=Ctsd PE=1 SV=1	TTEPVSELLK
p03549	-4.90584	133.316	-2.64031	0.0186551	0.361932	-3.79828	CAZA1	F-actin-capping protein subunit alpha-1 OS=Mus musculus GN=Capza1 PE=1 SV=4	LLLNNDNLLR
p02009	-4.02664	69.6199	-2.40057	0.0375996	0.361932	-3.91892	CD14	Monocyte differentiation antigen CD14 OS=Mus musculus GN=Cd14 PE=1 SV=1	GNPFLDSESHSEK
p02687	-9.27808	156.394	-2.34448	0.0476198	0.361932	-4.35363	CLH1	Clathrin heavy chain 1 OS=Mus musculus GN=Cltc PE=1 SV=3	ISGETIFVTAPHEATAGIIGVNR
p05695	-7.08929	97.6641	-2.47981	0.035384	0.361932	-4.30009	CMPK2	UMP-CMP kinase 2, mitochondrial OS=Mus musculus GN=Cmpk2 PE=1 SV=2	TKEEAELEANNVFR
p02363	-8.63594	148.713	-3.43881	0.0278125	0.361932	-4.34009	DESM	Desmin OS=Mus musculus GN=Des PE=1 SV=3	IESLNEEIAFLKK
p05053	-4.37311	62.8757	-2.50284	0.0244915	0.361932	-3.84693	DPYL2	Dihydropyrimidinase-related protein 2 OS=Mus musculus GN=Dpysl2 PE=1 SV=2	SAAEVIAQAR
p04320	-8.24626	66.1992	-3.27247	0.0323264	0.361932	-4.34961	DYL2	Dynein light chain 2, cytoplasmic OS=Mus musculus GN=Dynll2 PE=1 SV=1	NFGSYVTHETK
p00729	-5.19102	146.052	-4.09735	0.00669719	0.361932	-3.77212	ECM1	Extracellular matrix protein 1 OS=Mus musculus GN=Ecm1 PE=1 SV=2	DILTLDLSR
p02417	-4.0682	90.3055	-2.38601	0.0298533	0.361932	-3.98775	EF1A2	Elongation factor 1-alpha 2 OS=Mus musculus GN=Eef1a2 PE=1 SV=1	IGGIGTVPVGR
p05782	-3.66103	170.142	-2.27517	0.0321709	0.361932	-3.74875	EF1B	Elongation factor 1-beta OS=Mus musculus GN=Eef1b PE=1 SV=5	TPAGLQVLNDYLADK
p06134	-5.91556	101.589	-2.97047	0.00863424	0.361932	-3.57173	EF2	Elongation factor 2 OS=Mus musculus GN=Eef2 PE=1 SV=2	VFSGVVSTGLK
p02580	-3.19095	68.6612	-2.69037	0.0316528	0.361932	-4.02695	EF2	Elongation factor 2 OS=Mus musculus GN=Eef2 PE=1 SV=2	IMGPNYTPGK
p06367	-3.23794	105.168	-2.23066	0.0368161	0.361932	-3.85225	EF2	Elongation factor 2 OS=Mus musculus GN=Eef2 PE=1 SV=2	VNFTVDQIR
p00460	-4.55647	126.757	-2.22125	0.0449215	0.361932	-3.9795	EF2	Elongation factor 2 OS=Mus musculus GN=Eef2 PE=1 SV=2	ARPFPDGLAEDIDKGEVSAR
p06113	-4.60197	68.4524	-2.62372	0.0211881	0.361932	-3.63905	ESTD	S-formylglutathione hydrolase OS=Mus musculus GN=Esd PE=1 SV=1	VFEHSSVELK
p03613	-5.83684	107.625	-3.93606	0.00585772	0.361932	-3.58378	FABP5	Fatty acid-binding protein, epidermal OS=Mus musculus GN=Fabp5 PE=1 SV=3	LMESHGFEEYMK
p03611	9.63746	90.4949	2.87799	0.0209499	0.361932	-4.24065	FABP5	Fatty acid-binding protein, epidermal OS=Mus musculus GN=Fabp5 PE=1 SV=3	LMESHGFEEYMK	Oxidation (M)
p06529	-5.26445	167.119	-2.85913	0.0248898	0.361932	-4.06467	FLNA	Filamin-A OS=Mus musculus GN=Flna PE=1 SV=5	VTYTPMAPGSYLISIK
p06706	-4.14179	127.557	-2.60133	0.0290265	0.361932	-3.79544	FLNA	Filamin-A OS=Mus musculus GN=Flna PE=1 SV=5	YIPVQQGPVGVNVTYGGDHIPK
p01763	-3.89247	76.4592	-2.44953	0.0248544	0.361932	-3.84852	G3P	Glyceraldehyde-3-phosphate dehydrogenase OS=Mus musculus GN=Gapdh PE=1 SV=2	GAAQNIIPASTGAAK
p02183	-9.24929	61.222	-6.73154	0.000159963	0.21611	-3.41136	G6PI	Glucose-6-phosphate isomerase OS=Mus musculus GN=Gpi PE=1 SV=4	HFVALSTNTAK
p02266	-4.76822	69.4605	-3.45218	0.0190222	0.361932	-3.96682	GELS	Gelsolin OS=Mus musculus GN=Gsn PE=1 SV=3	HVVPNEVVVQR
p02970	-7.67625	134.095	-3.57431	0.00745677	0.361932	-3.83044	GLRX1	Glutaredoxin-1 OS=Mus musculus GN=Glrx PE=1 SV=3	KTQEILSQLPFK
p02969	-6.62854	138.508	-3.66024	0.0229183	0.361932	-4.15583	GLRX1	Glutaredoxin-1 OS=Mus musculus GN=Glrx PE=1 SV=3	KTQEILSQLPFK
p05810	-6.9582	150.09	-3.1783	0.0255536	0.361932	-4.1374	GLRX1	Glutaredoxin-1 OS=Mus musculus GN=Glrx PE=1 SV=3	TQEILSQLPFK
p00959	-2.5824	183.938	-2.13527	0.0498017	0.361932	-3.93321	GPNMB	Transmembrane glycoprotein NMB OS=Mus musculus GN=Gpnmb PE=1 SV=2	DVYVITDQIPVFVTMSQK	Oxidation (M)
p01636	-7.35968	88.4845	-2.79172	0.0212986	0.361932	-4.05808	GRIK1	Glutamate receptor ionotropic, kainate 1 OS=Mus musculus GN=Grik1 PE=2 SV=2	FMNLIK
p01581	-4.3372	150.125	-3.5596	0.0124045	0.361932	-3.79047	HA13	H-2 class I histocompatibility antigen, D-K alpha chain OS=Mus musculus GN=H2-D1 PE=1 SV=1	FISVGYVDNTEFVR
p01580	-4.3372	150.125	-3.5596	0.0124045	0.361932	-3.79047	HA1K	H-2 class I histocompatibility antigen, K-K alpha chain OS=Mus musculus GN=H2-K1 PE=1 SV=1	FISVGYVDDTQFVR
p03379	-4.66941	85.5831	-2.92283	0.0140356	0.361932	-3.53196	HBB2	Hemoglobin subunit beta-2 OS=Mus musculus GN=Hbb-b2 PE=1 SV=2	LHVDPENFR
p06735	-3.00732	114.706	-2.29491	0.0408019	0.361932	-3.84616	HMOX1	Heme oxygenase 1 OS=Mus musculus GN=Hmox1 PE=1 SV=1	YLGDLSGGQVLK
p01346	-4.54273	86.8416	-2.31735	0.0312811	0.361932	-3.83028	HOMEZ		EQLAILK
p06185	-10.5236	158.266	-3.29315	0.0171156	0.361932	-4.25319	IF5A2	Eukaryotic translation initiation factor 5A-2 OS=Mus musculus GN=Eif5a2 PE=1 SV=3	VHLVGIDIFTGK
p06186	-6.39886	156.099	-2.49305	0.0207327	0.361932	-3.66199	IF5A2	Eukaryotic translation initiation factor 5A-2 OS=Mus musculus GN=Eif5a2 PE=1 SV=3	VHLVGIDIFTGK
p05312	-4.42108	123.467	-3.64426	0.00852747	0.361932	-3.68753	IPO5	Importin-5 OS=Mus musculus GN=Ipo5 PE=1 SV=3	SLVEIADTVPK
p03023	-4.81313	133.829	-3.12844	0.020998	0.361932	-4.09027	IQGA1	Ras GTPase-activating-like protein IQGAP1 OS=Mus musculus GN=Iqgap1 PE=1 SV=2	LAAVAAINAAIQK
p01911	-5.80756	72.6711	-4.14492	0.00949991	0.361932	-3.86969	ITIH3	Inter-alpha-trypsin inhibitor heavy chain H3 OS=Mus musculus GN=Itih3 PE=1 SV=3	GHVSFKPSLDQQR
p01483	-4.75206	43.9819	-2.28199	0.048835	0.361932	-3.98435	ITIH3	Inter-alpha-trypsin inhibitor heavy chain H3 OS=Mus musculus GN=Itih3 PE=1 SV=3	FAHNVVTTR
p06507	-3.99871	57.7892	-2.28197	0.0401711	0.361932	-4.12304	K1C27	Keratin, type I cytoskeletal 27 OS=Mus musculus GN=Krt27 PE=1 SV=1	VTMQNLNDR
p03892	-4.08671	156.64	-2.57432	0.0429727	0.361932	-4.03007	KAP0	cAMP-dependent protein kinase type I-alpha regulatory subunit OS=Mus musculus GN=Prkar1a PE=1 SV=3	LTVADALEPVQFEDGQK
p01975	-6.58926	115.754	-3.08282	0.00718895	0.361932	-3.47298	KATL2	Katanin p60 ATPase-containing subunit A-like 2 OS=Mus musculus GN=Katnal2 PE=2 SV=2	GLLLYGPPGTGK
p01641	-6.46669	166.101	-2.36965	0.0356451	0.361932	-4.10239	KCD12	BTB/POZ domain-containing protein KCTD12 OS=Mus musculus GN=Kctd12 PE=1 SV=1	FNFLEQAFDK
p01821	-5.18495	88.3518	-3.05771	0.00757539	0.361932	-3.49322	KPYM	Pyruvate kinase PKM OS=Mus musculus GN=Pkm PE=1 SV=4	GDYPLEAVR
p03381	-5.64892	91.9953	-2.91747	0.0121124	0.361932	-3.68509	KSYK	Tyrosine-protein kinase SYK OS=Mus musculus GN=Syk PE=1 SV=2	LIATTAHEK
p01875	-3.19614	120.216	-2.38764	0.0330195	0.361932	-3.77658	LASP1	LIM and SH3 domain protein 1 OS=Mus musculus GN=Lasp1 PE=1 SV=1	GFSVVADTPELQR
p04813	-3.17596	40.9973	-2.26497	0.0473181	0.361932	-4.0712	LASP1	LIM and SH3 domain protein 1 OS=Mus musculus GN=Lasp1 PE=1 SV=1	QQSELQSQVR
p05045	-7.48129	63.7103	-2.13969	0.0464408	0.361932	-3.9197	LDHA	L-lactate dehydrogenase A chain OS=Mus musculus GN=Ldha PE=1 SV=3	RVHPISTMIK
p03928	-5.88676	88.5775	-2.95233	0.00897303	0.361932	-3.58264	LDHC	L-lactate dehydrogenase C chain OS=Mus musculus GN=Ldhc PE=1 SV=2	LVIITAGAR
p05998	-7.70489	86.0566	-3.33027	0.00898463	0.361932	-3.86146	LEG3	Galectin-3 OS=Mus musculus GN=Lgals3 PE=1 SV=3	VAVNDAHLLQYNHR
p05997	-4.86224	85.0305	-2.94024	0.00920594	0.361932	-3.23952	LEG3	Galectin-3 OS=Mus musculus GN=Lgals3 PE=1 SV=3	VAVNDAHLLQYNHR
p05538	-4.15277	101.229	-2.31311	0.0328443	0.361932	-3.96205	LMNA	Prelamin-A/C OS=Mus musculus GN=Lmna PE=1 SV=2	TALINSTGEEVAMR
p00433	-4.32043	48.1967	-2.69292	0.0136705	0.361932	-3.30943	MOES	Moesin OS=Mus musculus GN=Msn PE=1 SV=3	AQMVQEDLEK	Oxidation (M)
p05813	-5.18351	143.281	-2.70895	0.0435699	0.361932	-4.18323	MOES	Moesin OS=Mus musculus GN=Msn PE=1 SV=3	TQEQLASEMAELTAR
p01144	-3.81919	73.8148	-3.51726	0.00431583	0.361932	-3.15754	MYL3	Myosin light chain 3 OS=Mus musculus GN=Myl3 PE=1 SV=4	EGNGTVMGAELR
p01142	-3.81919	73.8148	-3.51726	0.00431583	0.361932	-3.15754	MYL6	Myosin light polypeptide 6 OS=Mus musculus GN=Myl6 PE=1 SV=3	EGNGTVMGAEIR
p06350	-3.00862	84.8887	-2.18166	0.0396746	0.361932	-3.79138	NDKA	Nucleoside diphosphate kinase A OS=Mus musculus GN=Nme1 PE=1 SV=1	VMLGETNPADSKPGTIR
p05608	-4.42424	94.983	-2.20593	0.039336	0.361932	-3.85318	NDKB	Nucleoside diphosphate kinase B OS=Mus musculus GN=Nme2 PE=1 SV=1	TFIAIKPDGVQR
p01835	-4.26562	71.2432	-3.01089	0.00943345	0.361932	-3.41453	OTUB1	Ubiquitin thioesterase OTUB1 OS=Mus musculus GN=Otub1 PE=1 SV=2	GEGGTTNPHVFPEGSEPK
p05816	-3.57628	172.057	-2.44281	0.0452505	0.361932	-4.06274	PARK7	Protein deglycase DJ-1 OS=Mus musculus GN=Park7 PE=1 SV=1	TQGPYDVVVLPGGNLGAQNLSESPMVK
p02289	-4.21269	48.0606	-2.17261	0.0476536	0.361932	-4.17804	PCBP1	Poly(rC)-binding protein 1 OS=Mus musculus GN=Pcbp1 PE=1 SV=1	IANPVEGSSGR
p06329	-5.33878	159.435	-2.61691	0.0406134	0.361932	-4.19161	PEBP1	Phosphatidylethanolamine-binding protein 1 OS=Mus musculus GN=Pebp1 PE=1 SV=3	VLTPTQVMNRPSSISWDGLDPGK
p04009	-8.82554	132	-3.02913	0.00666209	0.361932	-3.09957	PERI	Peripherin OS=Mus musculus GN=Prph PE=1 SV=2	MALDIEIATYR	Oxidation (M)
p01696	-3.86373	123.974	-2.63326	0.0234897	0.361932	-3.68068	PGAM1	Phosphoglycerate mutase 1 OS=Mus musculus GN=Pgam1 PE=1 SV=3	FSGWYDADLSPAGHEEAK
p04123	-8.46627	99.9603	-2.72852	0.0425819	0.361932	-4.34573	PIPNA	Phosphatidylinositol transfer protein alpha isoform OS=Mus musculus GN=Pitpna PE=1 SV=2	MLAPEGALNIHEK
p01679	-5.82449	111.652	-2.25504	0.0481195	0.361932	-4.18231	PLD4	Phospholipase D4 OS=Mus musculus GN=Pld4 PE=1 SV=1	FQQLLLR
p03894	-5.18671	65.784	-2.31556	0.0434352	0.361932	-4.18911	PLEC	Plectin OS=Mus musculus GN=Plec PE=1 SV=3	LTVDEAVR
p02196	-9.87763	84.6505	-3.25665	0.00877699	0.361932	-3.89637	PLF4	Platelet factor 4 OS=Mus musculus GN=Pf4 PE=1 SV=1	HITSLEVIK
p06817	-4.7287	172.895	-2.57042	0.0305259	0.361932	-3.82653	PLSL	Plastin-2 OS=Mus musculus GN=Lcp1 PE=1 SV=4	YTLNILEDIGGGQK
p00594	-4.53653	119.983	-2.28069	0.046077	0.361932	-3.89145	PLSL	Plastin-2 OS=Mus musculus GN=Lcp1 PE=1 SV=4	AYYHLLEQVAPK
p04114	-3.00524	139.278	-2.20917	0.0384842	0.361932	-3.82389	PLST	Plastin-3 OS=Mus musculus GN=Pls3 PE=1 SV=3	MINLSVPDTIDER
p06516	-7.48954	101.221	-3.70267	0.00790186	0.361932	-3.9361	PLTP	Phospholipid transfer protein OS=Mus musculus GN=Pltp PE=1 SV=1	VTSAALDLVK
p02128	-5.23056	178.646	-2.98934	0.0176952	0.361932	-3.69697	PLTP	Phospholipid transfer protein OS=Mus musculus GN=Pltp PE=1 SV=1	GVQIPLPEGINFVR
p06462	-4.11789	143.721	-2.21186	0.0368028	0.361932	-3.76601	PPIA	Peptidyl-prolyl cis-trans isomerase A OS=Mus musculus GN=Ppia PE=1 SV=2	VSFELFADKVPK
p05303	-7.86175	83.034	-2.76504	0.0162019	0.361932	-4.19618	PRDX2	Peroxiredoxin-2 OS=Mus musculus GN=Prdx2 PE=1 SV=3	SLSQNYGVLK
p03465	-3.75675	107.931	-2.38908	0.0306031	0.361932	-3.94245	PRDX5	Peroxiredoxin-5, mitochondrial OS=Mus musculus GN=Prdx5 PE=1 SV=2	LLADPTGAFGK
p00541	-3.00883	69.7098	-2.34945	0.0472544	0.361932	-3.97242	PSA3	Proteasome subunit alpha type-3 OS=Mus musculus GN=Psma3 PE=1 SV=3	AVENSSTAIGIR
p00403	-4.11663	126.518	-2.43162	0.0318502	0.361932	-3.83703	PSME2	Proteasome activator complex subunit 2 OS=Mus musculus GN=Psme2 PE=1 SV=4	APLDIPIPDPPPKDDEMETDKQEK
p03937	-4.31902	74.7114	-2.4182	0.0280046	0.361932	-3.97053	RAN	GTP-binding nuclear protein Ran OS=Mus musculus GN=Ran PE=1 SV=3	LVLVGDGGTGK
p00739	-2.8506	163.643	-2.57552	0.0373374	0.361932	-4.01379	RINI	Ribonuclease inhibitor OS=Mus musculus GN=Rnh1 PE=1 SV=1	DISSAVQANPALTELSLR
p03275	-4.21423	179.768	-2.27442	0.0465684	0.361932	-3.93272	ROA3	Heterogeneous nuclear ribonucleoprotein A3 OS=Mus musculus GN=Hnrnpa3 PE=1 SV=1	LFIGGLSFETTDDSLR
p01257	-4.96465	118.333	-2.46407	0.0255562	0.361932	-3.85889	S10A4	Protein S100-A4 OS=Mus musculus GN=S100a4 PE=1 SV=1	ELPSFLGK
p00850	-5.15245	71.7913	-2.89574	0.0203919	0.361932	-3.85696	SAA3	Serum amyloid A-3 protein OS=Mus musculus GN=Saa3 PE=1 SV=1	DPNHFRPAGLPK
p02567	-8.86181	119.454	-3.5864	0.024426	0.361932	-4.33236	SELB	Selenocysteine-specific elongation factor OS=Mus musculus GN=Eefsec PE=1 SV=2	ILTPTLK
p00754	-5.81057	170.326	-3.09284	0.0179386	0.361932	-3.98538	SGPL1	Sphingosine-1-phosphate lyase 1 OS=Mus musculus GN=Sgpl1 PE=1 SV=1	DLALEKGIK
p02261	-5.92187	54.4635	-3.18209	0.00433298	0.361932	-3.28028	SODC	Superoxide dismutase [Cu-Zn] OS=Mus musculus GN=Sod1 PE=1 SV=2	HVGDLGNVTAGK
p02097	-4.42458	126.557	-2.57216	0.0198734	0.361932	-3.81292	SPB6	Serpin B6 OS=Mus musculus GN=Serpinb6 PE=1 SV=1	GTTASQMAQALALDK
p05404	-7.12546	61.5894	-5.08652	0.00412406	0.361932	-3.77925	STB5L	Syntaxin-binding protein 5-like OS=Mus musculus GN=Stxbp5l PE=1 SV=1	SRSSSISSIDK
p02562	-9.60934	167.907	-3.65754	0.00661756	0.361932	-3.83228	TALD3	Protein TALPID3 OS=Mus musculus GN=Talpid3 PE=1 SV=1	ILRGVQNNKK
p04723	-4.29694	126.221	-2.22659	0.0365969	0.361932	-3.76166	TBA8	Tubulin alpha-8 chain OS=Mus musculus GN=Tuba8 PE=1 SV=1	QLFHPEQLITGK
p06760	-5.76779	145.122	-2.76191	0.0250109	0.361932	-3.71364	TBB4A	Tubulin beta-4A chain OS=Mus musculus GN=Tubb4a PE=1 SV=3	YLTVAAVFR
p01922	-6.58926	115.754	-3.08282	0.00718895	0.361932	-3.47298	TERA	Transitional endoplasmic reticulum ATPase OS=Mus musculus GN=Vcp PE=1 SV=4	GILLYGPPGTGK
p06588	-5.00155	107.911	-2.71525	0.0160634	0.361932	-3.75541	TERA	Transitional endoplasmic reticulum ATPase OS=Mus musculus GN=Vcp PE=1 SV=4	WALSQSNPSALR
p03355	-4.71784	101.442	-2.4258	0.0267944	0.361932	-4.03003	TKT	Transketolase OS=Mus musculus GN=Tkt PE=1 SV=1	LGQSDPAPLQHQVDIYQK
p02446	-4.54961	70.7149	-2.22514	0.0409372	0.361932	-4.14226	TKT	Transketolase OS=Mus musculus GN=Tkt PE=1 SV=1	IIALDGDTK
p05228	3.44586	183.665	2.56959	0.0432438	0.361932	-4.05587	TKT	Transketolase OS=Mus musculus GN=Tkt PE=1 SV=1	SKDDQVTVIGAGVTLHEALAAAESLKK
p06144	-3.40156	118.313	-2.38927	0.0410103	0.361932	-3.88476	TLN1	Talin-1 OS=Mus musculus GN=Tln1 PE=1 SV=2	VGDDPAVWQLK
p01411	-5.07328	58.3018	-2.61716	0.0351626	0.361932	-4.15993	TLN2	Talin-2 OS=Mus musculus GN=Tln2 PE=1 SV=3	EVANSTANLVK
p03339	-3.57197	131.59	-2.19041	0.0428431	0.361932	-3.87322	TPD52	Tumor protein D52 OS=Mus musculus GN=Tpd52 PE=1 SV=2	LGISSLQEFK
p05692	-5.99335	135.092	-2.7665	0.0283894	0.361932	-4.07509	TSP1	Thrombospondin-1 OS=Mus musculus GN=Thbs1 PE=1 SV=1	TIVTTLQDSIR
p04203	-6.32829	87.792	-3.07201	0.00560491	0.361932	-3.15837	UBC	Polyubiquitin-C OS=Mus musculus GN=Ubc PE=1 SV=2	MQIFVK
p06302	-5.22864	91.9197	-2.90915	0.0108743	0.361932	-3.64532	VAT1	Synaptic vesicle membrane protein VAT-1 homolog OS=Mus musculus GN=Vat1 PE=1 SV=3	VLLVPGPEK
p00702	-2.42628	66.9832	-2.43263	0.0335095	0.361932	-3.85519	VIME	Vimentin OS=Mus musculus GN=Vim PE=1 SV=3	DGQVINETSQHHDDLE
p01187	-3.9594	105.018	-3.35981	0.0157751	0.361932	-3.83586	VP26A	Vacuolar protein sorting-associated protein 26A OS=Mus musculus GN=Vps26a PE=1 SV=1	EITGIGPSTTTETETIAK
p02298	-3.87118	47.6318	-2.62349	0.0348437	0.361932	-4.12581	WDR1	WD repeat-containing protein 1 OS=Mus musculus GN=Wdr1 PE=1 SV=3	IAVVGEGR
p06582	-4.49047	129.109	-2.13972	0.0464386	0.361932	-3.90817	WDR1	WD repeat-containing protein 1 OS=Mus musculus GN=Wdr1 PE=1 SV=3	VYSILASTLK
