# Supplementary material for: RAS–p110α signalling in macrophages is required for effective inflammatory response and resolution of inflammation
Source: eLife. 2025 Apr 24;13:RP94590. doi: 10.7554/eLife.94590 (PMC12021417; doi:10.7554/eLife.94590)
Supplement: Supplementary file 2. [file elife-94590-supp2.xlsx]

## Sheet: (2)  R.LKR v W.LKR
db.ID	logFC	AveExpr	t	P.Value	adj.P.Val	B	acc_no	protein	Peptide	pep_mod
p06759	-1.78402	52.5879	-2.21177	0.0364017	0.211231	-3.78865	1433B_MOUSE	14-3-3 protein beta/alpha OS=Mus musculus GN=Ywhab PE=1 SV=3	YLSEVASGENK
p06718	-4.94857	91.2149	-4.07694	0.000717391	0.158725	-0.391574	1433E_MOUSE	14-3-3 protein epsilon OS=Mus musculus GN=Ywhae PE=1 SV=1	YLAEFATGNDR
p00979	-2.87466	74.0328	-3.17608	0.00423323	0.171109	-1.90942	1433E_MOUSE	14-3-3 protein epsilon OS=Mus musculus GN=Ywhae PE=1 SV=1	EAAENSLVAYK
p06648	-2.67412	74.7014	-2.60467	0.0162257	0.18159	-3.04473	1433E_MOUSE	14-3-3 protein epsilon OS=Mus musculus GN=Ywhae PE=1 SV=1	YDEMVESMK
p02204	-3.022	47.4962	-2.21727	0.0363847	0.211231	-3.78365	1433E_MOUSE	14-3-3 protein epsilon OS=Mus musculus GN=Ywhae PE=1 SV=1	HLIPAANTGESK
p04476	-2.53209	72.1252	-3.04458	0.00597397	0.179252	-2.22374	1433F_MOUSE	14-3-3 protein eta OS=Mus musculus GN=Ywhah PE=1 SV=2	NSVVEASEAAYK
p04513	-3.74557	90.6479	-3.28468	0.00326535	0.171109	-1.68582	1433G_MOUSE	14-3-3 protein gamma OS=Mus musculus GN=Ywhag PE=1 SV=2	NVTELNEPLSNEER
p04399	-4.41175	105.358	-3.58949	0.00248217	0.158725	-1.37666	1433S_MOUSE	14-3-3 protein sigma OS=Mus musculus GN=Sfn PE=1 SV=2	NLLSVAYK
p01613	-3.29565	100.161	-2.60678	0.0169366	0.183115	-3.0662	1433Z_MOUSE	14-3-3 protein zeta/delta OS=Mus musculus GN=Ywhaz PE=1 SV=1	FLIPNASQPESK
p05512	-1.65449	61.1804	-2.34382	0.0273867	0.200557	-3.55077	1433Z_MOUSE	14-3-3 protein zeta/delta OS=Mus musculus GN=Ywhaz PE=1 SV=1	SVTEQGAELSNEER
p06719	-2.02942	63.9606	-2.146	0.0444148	0.22567	-3.92747	1433Z_MOUSE	14-3-3 protein zeta/delta OS=Mus musculus GN=Ywhaz PE=1 SV=1	YLAEVAAGDDK
p06721	-2.20935	51.2754	-2.09924	0.0461145	0.226786	-3.98428	1433Z_MOUSE	14-3-3 protein zeta/delta OS=Mus musculus GN=Ywhaz PE=1 SV=1	YLAEVAAGDDKK
p00191	-4.88403	92.0893	-3.75973	0.0011627	0.158725	-0.814244	6PGD_MOUSE	6-phosphogluconate dehydrogenase, decarboxylating OS=Mus musculus GN=Pgd PE=1 SV=3	AGQAVDDFIEK
p00229	-5.12285	100.864	-2.98686	0.00661764	0.179252	-2.29138	6PGD_MOUSE	6-phosphogluconate dehydrogenase, decarboxylating OS=Mus musculus GN=Pgd PE=1 SV=3	AIFQAIAAK
p02174	-6.33118	114.466	-4.49578	0.0117578	0.179252	-2.60859	6PGD_MOUSE	6-phosphogluconate dehydrogenase, decarboxylating OS=Mus musculus GN=Pgd PE=1 SV=3	HEMLPANLIQAQR
p06006	-3.34516	88.2133	-2.36582	0.027754	0.201231	-3.43125	6PGD_MOUSE	6-phosphogluconate dehydrogenase, decarboxylating OS=Mus musculus GN=Pgd PE=1 SV=3	VDDFLANEAK
p04259	-4.51169	114.778	-2.21407	0.0400755	0.218999	-3.7034	A2MP_MOUSE	Alpha-2-macroglobulin-P OS=Mus musculus GN=A2mp PE=2 SV=2	MVSGFIPLKPTVK	Oxidation (M)
p02233	-3.07554	49.5456	-2.44146	0.0259574	0.199849	-3.44116	ACTBL_MOUSE	Beta-actin-like protein 2 OS=Mus musculus GN=Actbl2 PE=1 SV=1	HQGVMVGMGQK
p02234	-2.96332	48.9759	-2.25737	0.0367499	0.212516	-3.74588	ACTBL_MOUSE	Beta-actin-like protein 2 OS=Mus musculus GN=Actbl2 PE=1 SV=1	HQGVMVGMGQK
p04623	-2.53173	65.9307	-2.98046	0.00635075	0.179252	-2.2994	ACTG_MOUSE	Actin, cytoplasmic 2 OS=Mus musculus GN=Actg1 PE=1 SV=1	QEYDESGPSIVHR
p02156	-2.55417	73.1389	-2.92636	0.00722612	0.179252	-2.41142	ACTG_MOUSE	Actin, cytoplasmic 2 OS=Mus musculus GN=Actg1 PE=1 SV=1	GYSFTTTAER
p04622	-2.42095	66.0545	-2.75318	0.0113584	0.179252	-2.78897	ACTG_MOUSE	Actin, cytoplasmic 2 OS=Mus musculus GN=Actg1 PE=1 SV=1	QEYDESGPSIVHR
p04621	-1.61693	84.4202	-2.26244	0.0326643	0.206261	-3.69839	ACTG_MOUSE	Actin, cytoplasmic 2 OS=Mus musculus GN=Actg1 PE=1 SV=1	QEYDESGPSIVHR	Gln->pyro-Glu (N-term Q)
p03045	-4.5163	109.9	-3.04442	0.00826619	0.179252	-2.39572	ACTN1_MOUSE	Alpha-actinin-1 OS=Mus musculus GN=Actn1 PE=1 SV=1	LAILGIHNEVSK
p04124	-2.89387	119.563	-2.59523	0.0236165	0.193052	-3.19993	ACTN1_MOUSE	Alpha-actinin-1 OS=Mus musculus GN=Actn1 PE=1 SV=1	MLDAEDIVGTARPDEK
p01182	-2.43244	69.3834	-2.63015	0.0147063	0.18159	-3.01754	ACTS_MOUSE	Actin, alpha skeletal muscle OS=Mus musculus GN=Acta1 PE=1 SV=1	EITALAPSTMK	Oxidation (M)
p01183	-2.93148	91.1639	-2.61054	0.015095	0.18159	-3.04571	ACTS_MOUSE	Actin, alpha skeletal muscle OS=Mus musculus GN=Acta1 PE=1 SV=1	EITALAPSTMK
p06778	-3.29018	137.296	-2.17646	0.0487611	0.232262	-3.7988	ACTS_MOUSE	Actin, alpha skeletal muscle OS=Mus musculus GN=Acta1 PE=1 SV=1	YPIEHGIITNWDDMEK
p01467	-2.76624	108.045	-2.76189	0.0129056	0.18029	-2.81759	AINX_MOUSE	Alpha-internexin OS=Mus musculus GN=Ina PE=1 SV=3	EYQDLLNVK
p05345	-4.78376	96.6433	-2.61485	0.0162335	0.18159	-2.99553	AK1A1_MOUSE	Alcohol dehydrogenase [NADP(+)] OS=Mus musculus GN=Akr1a1 PE=1 SV=3	SPAQILLR
p02193	-3.24957	49.4951	-2.56713	0.0180166	0.183115	-3.12586	AK1A1_MOUSE	Alcohol dehydrogenase [NADP(+)] OS=Mus musculus GN=Akr1a1 PE=1 SV=3	HHPEDVEPALR
p01964	-2.69917	122.988	-2.38362	0.0272421	0.200373	-3.40694	AK1A1_MOUSE	Alcohol dehydrogenase [NADP(+)] OS=Mus musculus GN=Akr1a1 PE=1 SV=3	GLEVTAYSPLGSSDR
p05344	-4.78376	96.6433	-2.61485	0.0162335	0.18159	-2.99553	AKCL2_MOUSE	1,5-anhydro-D-fructose reductase OS=Mus musculus GN=Akr1e2 PE=1 SV=1	SPAQILIR
p02212	-3.95411	109.19	-2.67348	0.0204531	0.190299	-3.1066	AL3A2_MOUSE	Fatty aldehyde dehydrogenase OS=Mus musculus GN=Aldh3a2 PE=1 SV=2	HLTPVTLELGGK
p00056	-4.53586	92.4359	-3.05445	0.00547309	0.179252	-2.13625	ALDOA_MOUSE	Fructose-bisphosphate aldolase A OS=Mus musculus GN=Aldoa PE=1 SV=2	ADDGRPFPQVIK
p01918	-4.63298	89.0027	-3.21479	0.00584286	0.179252	-2.13351	ALDOA_MOUSE	Fructose-bisphosphate aldolase A OS=Mus musculus GN=Aldoa PE=1 SV=2	GILAADESTGSIAK
p04531	-4.12109	67.9585	-3.02015	0.00708112	0.179252	-2.3152	ALDOA_MOUSE	Fructose-bisphosphate aldolase A OS=Mus musculus GN=Aldoa PE=1 SV=2	PHPYPALTPEQK
p01273	-2.20783	43.7152	-2.2153	0.0361287	0.211231	-3.78239	ALDOA_MOUSE	Fructose-bisphosphate aldolase A OS=Mus musculus GN=Aldoa PE=1 SV=2	ELSDIAHR
p02412	-3.63271	168.832	-2.2584	0.0393983	0.218999	-3.72754	ALDOA_MOUSE	Fructose-bisphosphate aldolase A OS=Mus musculus GN=Aldoa PE=1 SV=2	IGEHTPSALAIMENANVLAR	Oxidation (M)
p03769	-1.4866	52.8603	-2.15367	0.0411584	0.221226	-3.89049	ALDOA_MOUSE	Fructose-bisphosphate aldolase A OS=Mus musculus GN=Aldoa PE=1 SV=2	LQSIGTENTEENR
p03770	-1.88103	46.4705	-2.144	0.0424316	0.223065	-3.91129	ALDOA_MOUSE	Fructose-bisphosphate aldolase A OS=Mus musculus GN=Aldoa PE=1 SV=2	LQSIGTENTEENRR
p06243	-2.74732	59.3308	-2.21846	0.0358865	0.211231	-3.7768	ALDOB_MOUSE		VLAAVYK
p00276	-6.04788	103.193	-4.79025	0.00103039	0.158725	-0.604633	ANXA1_MOUSE	Annexin A1 OS=Mus musculus GN=Anxa1 PE=1 SV=2	ALDLELK
p05784	-2.57564	93.0582	-2.96344	0.00772084	0.179252	-2.42919	ANXA1_MOUSE	Annexin A1 OS=Mus musculus GN=Anxa1 PE=1 SV=2	TPAQFDADELR
p04309	22.1947	72.8193	15.0508	1.52273e-09	2.55362e-06	6.05614	APOE_MOUSE	Apolipoprotein E OS=Mus musculus GN=Apoe PE=1 SV=2	NEVHTMLGQSTEEIR	Oxidation (M)
p03714	-4.92855	99.5101	-3.63721	0.00190406	0.158725	-1.17423	APOE_MOUSE	Apolipoprotein E OS=Mus musculus GN=Apoe PE=1 SV=2	LQAEIFQAR
p04310	-3.65804	96.4655	-2.83217	0.0103425	0.179252	-2.67826	APOE_MOUSE	Apolipoprotein E OS=Mus musculus GN=Apoe PE=1 SV=2	NEVHTMLGQSTEEIR
p05547	-2.6396	71.1201	-2.73495	0.0128131	0.18029	-2.86924	APOE_MOUSE	Apolipoprotein E OS=Mus musculus GN=Apoe PE=1 SV=2	TANLGAGAAQPLR
p03352	-2.80457	68.8599	-2.43673	0.0238701	0.193052	-3.41118	APOE_MOUSE	Apolipoprotein E OS=Mus musculus GN=Apoe PE=1 SV=2	LGPLVEQGR
p01218	-1.75194	101.66	-2.11121	0.0469956	0.229191	-3.98051	APOE_MOUSE	Apolipoprotein E OS=Mus musculus GN=Apoe PE=1 SV=2	ELEEQLGPVAEETR
p04475	-3.84947	94.0963	-3.56111	0.00197372	0.158725	-1.22726	ARC1B_MOUSE	Actin-related protein 2/3 complex subunit 1B OS=Mus musculus GN=Arpc1b PE=1 SV=4	NSVSQISVLSGGK
p00495	-2.63241	65.5071	-2.33971	0.0311197	0.206261	-3.54729	ARC1B_MOUSE	Actin-related protein 2/3 complex subunit 1B OS=Mus musculus GN=Arpc1b PE=1 SV=4	ASSEGGAATGAGLDSLHK
p02747	-3.81589	111.623	-2.46146	0.0318463	0.206261	-3.39281	ARPC4_MOUSE	Actin-related protein 2/3 complex subunit 4 OS=Mus musculus GN=Arpc4 PE=1 SV=3	IVAEEFLK
p00264	-2.98346	95.2265	-2.13587	0.0460206	0.226786	-3.89144	ARPC5_MOUSE	Actin-related protein 2/3 complex subunit 5 OS=Mus musculus GN=Arpc5 PE=1 SV=3	ALAAGGVGSIVR
p06072	-2.69647	94.2189	-2.78021	0.0112597	0.179252	-2.76611	B2MG_MOUSE	Beta-2-microglobulin OS=Mus musculus GN=B2m PE=1 SV=2	VEMSDMSFSK
p04950	-5.12767	137.604	-2.96098	0.0325746	0.206261	-3.23075	B4GT5_MOUSE	Beta-1,4-galactosyltransferase 5 OS=Mus musculus GN=B4galt5 PE=2 SV=2	RGLLRLPR
p00784	-6.07846	106.931	-3.9796	0.00267429	0.158725	-1.38301	BGH3_MOUSE	Transforming growth factor-beta-induced protein ig-h3 OS=Mus musculus GN=Tgfbi PE=1 SV=1	DLLNNHILK
p02534	-3.22916	91.7803	-2.92801	0.00944749	0.179252	-2.57161	BGH3_MOUSE	Transforming growth factor-beta-induced protein ig-h3 OS=Mus musculus GN=Tgfbi PE=1 SV=1	ILGDPEALR
p05299	-3.1589	55.2522	-2.47681	0.0430706	0.2242	-3.57675	BGH3_MOUSE	Transforming growth factor-beta-induced protein ig-h3 OS=Mus musculus GN=Tgfbi PE=1 SV=1	SLQGDKLEVSSK
p03725	-3.56425	56.6862	-2.76974	0.0151612	0.18159	-2.86048	BLVRB_MOUSE	Flavin reductase (NADPH) OS=Mus musculus GN=Blvrb PE=1 SV=3	LQDVTDDHIR
p02283	-6.43583	101.752	-2.77262	0.017038	0.183115	-3.03594	BLVRB_MOUSE	Flavin reductase (NADPH) OS=Mus musculus GN=Blvrb PE=1 SV=3	IAIFGATGR
p03702	-2.80611	93.7912	-2.38096	0.025988	0.199849	-3.49604	BLVRB_MOUSE	Flavin reductase (NADPH) OS=Mus musculus GN=Blvrb PE=1 SV=3	LPSEGPQPAHVVVGDVR
p03726	-2.30605	56.0843	-2.27757	0.0316184	0.206261	-3.6712	BLVRB_MOUSE	Flavin reductase (NADPH) OS=Mus musculus GN=Blvrb PE=1 SV=3	LQDVTDDHIR
p06402	-2.34826	64.8979	-2.26848	0.0470386	0.229191	-3.71971	C170B_MOUSE		VPEEALK
p04945	-2.96963	71.1959	-2.40305	0.0308443	0.206261	-3.49681	C1QA_MOUSE	Complement C1q subcomponent subunit A OS=Mus musculus GN=C1qa PE=1 SV=2	RGDEVWIEKDPAK
p04781	-3.25673	161.217	-2.27788	0.0369383	0.212585	-3.65884	C1QA_MOUSE	Complement C1q subcomponent subunit A OS=Mus musculus GN=C1qa PE=1 SV=2	QNPMTLGNVVIFDK
p06225	-1.79175	60.911	-2.3438	0.0290737	0.204859	-3.57837	C1QB_MOUSE	Complement C1q subcomponent subunit B OS=Mus musculus GN=C1qb PE=1 SV=2	VITNANENYEPR
p04893	-3.1408	72.8101	-2.41369	0.0261318	0.199849	-3.47277	C1QC_MOUSE	Complement C1q subcomponent subunit C OS=Mus musculus GN=C1qc PE=1 SV=2	QVSSGGVLLR
p00699	-2.42614	101.499	-2.75739	0.0141025	0.18159	-2.8667	CALM_MOUSE	Calmodulin OS=Mus musculus GN=Calm1 PE=1 SV=2	DGNGYISAAELR
p02831	-9.41797	104.088	-3.03607	0.0299284	0.206261	-3.34894	CAP1_MOUSE	Adenylyl cyclase-associated protein 1 OS=Mus musculus GN=Cap1 PE=1 SV=4	KEPALLELEGK
p06413	-2.72076	77.3442	-2.79951	0.0107842	0.179252	-2.72875	CAP2_MOUSE	Adenylyl cyclase-associated protein 2 OS=Mus musculus GN=Cap2 PE=1 SV=1	VPTISINK
p00753	-5.15897	103.735	-4.28752	0.000450119	0.158725	-0.0150521	CAPG_MOUSE	Macrophage-capping protein OS=Mus musculus GN=Capg PE=1 SV=2	DLALAIR
p02168	-3.02404	51.6621	-2.34417	0.029051	0.204859	-3.57771	CATB_MOUSE	Cathepsin B OS=Mus musculus GN=Ctsb PE=1 SV=2	HEAGDMMGGHAIR
p06480	-2.60598	117.141	-2.11768	0.0463851	0.22745	-3.96967	CATD_MOUSE	Cathepsin D OS=Mus musculus GN=Ctsd PE=1 SV=1	VSSLPTVYLK
p01809	-2.92733	106.426	-2.99538	0.00781085	0.179252	-2.41761	CATZ_MOUSE	Cathepsin Z OS=Mus musculus GN=Ctsz PE=1 SV=1	GDQLALLGR
p04509	-2.14611	73.5613	-2.49845	0.0209077	0.191597	-3.29828	CATZ_MOUSE	Cathepsin Z OS=Mus musculus GN=Ctsz PE=1 SV=1	NVNGVNYASVTR
p05934	-5.34704	108.296	-2.50599	0.0370851	0.212585	-3.44283	CATZ_MOUSE	Cathepsin Z OS=Mus musculus GN=Ctsz PE=1 SV=1	TYPRPHEYLSPADLPK
p06146	-1.63263	57.3797	-2.07839	0.0481506	0.230053	-4.01979	CATZ_MOUSE	Cathepsin Z OS=Mus musculus GN=Ctsz PE=1 SV=1	VGDYGSLSGR
p03549	-4.00091	133.316	-2.9664	0.00968422	0.179252	-2.51144	CAZA1_MOUSE	F-actin-capping protein subunit alpha-1 OS=Mus musculus GN=Capza1 PE=1 SV=4	LLLNNDNLLR
p02516	-3.44246	62.5793	-3.60858	0.0117056	0.179252	-2.44944	CBPC4_MOUSE		ILEDIR
p02009	-5.48089	69.6199	-3.77054	0.00374835	0.171109	-1.66996	CD14_MOUSE	Monocyte differentiation antigen CD14 OS=Mus musculus GN=Cd14 PE=1 SV=1	GNPFLDSESHSEK
p05410	-2.41188	68.968	-2.93192	0.00800278	0.179252	-2.46977	CFAB_MOUSE	Complement factor B OS=Mus musculus GN=Cfb PE=1 SV=2	SSDADWVTEK
p05461	-2.5225	79.6758	-2.88783	0.00884227	0.179252	-2.55652	CFAB_MOUSE	Complement factor B OS=Mus musculus GN=Cfb PE=1 SV=2	STGSWSDLQTR
p00309	-2.96764	69.3205	-2.54414	0.0193818	0.184677	-3.22569	CFAB_MOUSE	Complement factor B OS=Mus musculus GN=Cfb PE=1 SV=2	ALFVSEQGK
p03658	-2.07803	47.7847	-2.25765	0.0348142	0.211231	-3.73016	CFAB_MOUSE	Complement factor B OS=Mus musculus GN=Cfb PE=1 SV=2	LNQISYEDHK
p02766	-4.71991	110.086	-3.10002	0.021761	0.193052	-2.96876	CLH1_MOUSE	Clathrin heavy chain 1 OS=Mus musculus GN=Cltc PE=1 SV=3	IVLDNSVFSEHR
p04426	-2.74538	130.323	-2.46641	0.0263096	0.199849	-3.38783	CLH1_MOUSE	Clathrin heavy chain 1 OS=Mus musculus GN=Cltc PE=1 SV=3	NNLAGAEELFAR
p02135	-4.64918	105.067	-4.0511	0.0103925	0.179252	-2.38766	CLIC1_MOUSE	Chloride intracellular channel protein 1 OS=Mus musculus GN=Clic1 PE=1 SV=3	GVTFNVTTVDTK
p02325	-4.62606	79.6926	-4.1869	0.00428537	0.171109	-1.71536	CLUS_MOUSE	Clusterin OS=Mus musculus GN=Clu PE=1 SV=1	IDSLLESDR
p00469	-3.27112	164.327	-2.22612	0.0481417	0.230053	-3.83607	CLUS_MOUSE	Clusterin OS=Mus musculus GN=Clu PE=1 SV=1	ASGIIDTLFQDR
p05868	-4.76052	103.116	-4.28402	0.00132695	0.158725	-0.830122	CMPK2_MOUSE	UMP-CMP kinase 2, mitochondrial OS=Mus musculus GN=Cmpk2 PE=1 SV=2	TTLTQSVSESLK
p06340	-3.18535	49.7371	-2.3882	0.0297239	0.206261	-3.44519	CO3_MOUSE	Complement C3 OS=Mus musculus GN=C3 PE=1 SV=3	VLVVTQGSNAK
p02430	-2.88025	48.1407	-2.42886	0.0320102	0.206261	-3.41295	CO3_MOUSE	Complement C3 OS=Mus musculus GN=C3 PE=1 SV=3	IGQQEVEVK
p05877	-3.45744	73.3872	-2.42309	0.0323482	0.206261	-3.45235	CO3_MOUSE	Complement C3 OS=Mus musculus GN=C3 PE=1 SV=3	TVAIHTLDPEK
p01339	-3.00029	86.7163	-2.23161	0.0348944	0.211231	-3.75346	CO9_MOUSE		EQAILLK
p06638	-2.04667	97.7	-2.21212	0.0363745	0.211231	-3.78803	COF2_MOUSE	Cofilin-2 OS=Mus musculus GN=Cfl2 PE=1 SV=1	YALYDATYETK
p06126	-2.65252	38.9872	-2.19459	0.0396555	0.218999	-3.78198	COF2_MOUSE	Cofilin-2 OS=Mus musculus GN=Cfl2 PE=1 SV=1	VFNDMK
p06159	-9.33812	100.827	-5.82675	0.00230764	0.158725	-2.19545	COR1C_MOUSE	Coronin-1C OS=Mus musculus GN=Coro1c PE=1 SV=2	VGIVAWHPTAR
p01216	-3.93733	106.132	-2.81318	0.013197	0.181405	-2.76411	COTL1_MOUSE	Coactosin-like protein OS=Mus musculus GN=Cotl1 PE=1 SV=3	ELEEDFIR
p05687	-3.30823	106.168	-2.24563	0.0488901	0.232262	-3.7015	CXL16_MOUSE	C-X-C motif chemokine 16 OS=Mus musculus GN=Cxcl16 PE=1 SV=2	TISSGTQIPQGTLDHIR
p05638	-2.18116	66.4304	-2.34444	0.0308218	0.206261	-3.49536	CYC_MOUSE	Cytochrome c, somatic OS=Mus musculus GN=Cycs PE=1 SV=2	TGQAAGFSYTDANK
p04691	-4.31383	131.469	-2.58969	0.0175732	0.183115	-3.05339	CYTB_MOUSE	Cystatin-B OS=Mus musculus GN=Cstb PE=1 SV=1	QIVAGTNLFIK
p04139	-2.15597	76.2118	-2.50011	0.020833	0.191597	-3.29523	CYTC_MOUSE	Cystatin-C OS=Mus musculus GN=Cst3 PE=1 SV=2	MLGAPEEADANEEGVRR
p04135	-1.62012	74.4551	-2.39501	0.0265988	0.200028	-3.49585	CYTC_MOUSE	Cystatin-C OS=Mus musculus GN=Cst3 PE=1 SV=2	MLGAPEEADANEEGVR	Oxidation (M)
p06069	-2.46983	78.8791	-2.81348	0.00943565	0.179252	-2.64213	DESM_MOUSE	Desmin OS=Mus musculus GN=Des PE=1 SV=3	VELQELNDR
p05053	-5.31158	62.8757	-2.45457	0.0269277	0.200373	-3.35096	DPYL2_MOUSE	Dihydropyrimidinase-related protein 2 OS=Mus musculus GN=Dpysl2 PE=1 SV=2	SAAEVIAQAR
p06128	-3.85889	109.402	-2.56445	0.0338831	0.209675	-3.37423	DPYL2_MOUSE	Dihydropyrimidinase-related protein 2 OS=Mus musculus GN=Dpysl2 PE=1 SV=2	VFNLYPR
p02552	-2.613	48.7637	-2.77324	0.0136511	0.18159	-2.84249	DX39B_MOUSE	Spliceosome RNA helicase Ddx39b OS=Mus musculus GN=Ddx39b PE=1 SV=1	ILNDVQDR
p06844	-4.12524	107.778	-3.65806	0.00236271	0.158725	-1.31641	EF1A1_MOUSE	Elongation factor 1-alpha 1 OS=Mus musculus GN=Eef1a1 PE=1 SV=3	YYVTIIDAPGHR
p06845	-2.96104	107.143	-2.43434	0.0224414	0.193052	-3.38289	EF1A1_MOUSE	Elongation factor 1-alpha 1 OS=Mus musculus GN=Eef1a1 PE=1 SV=3	YYVTIIDAPGHR
p06658	-3.49136	44.369	-2.41229	0.0347332	0.211231	-3.46056	EF1A1_MOUSE	Elongation factor 1-alpha 1 OS=Mus musculus GN=Eef1a1 PE=1 SV=3	YEEIVK
p02417	-4.29403	90.3055	-3.79271	0.0016188	0.158725	-1.04295	EF1A2_MOUSE	Elongation factor 1-alpha 2 OS=Mus musculus GN=Eef1a2 PE=1 SV=1	IGGIGTVPVGR
p04727	-4.94584	70.6834	-2.84723	0.0148455	0.18159	-2.81883	EF1A2_MOUSE	Elongation factor 1-alpha 2 OS=Mus musculus GN=Eef1a2 PE=1 SV=1	QLIVGVNK
p03694	-2.85549	96.4327	-2.2875	0.0327168	0.206261	-3.62356	EF1A2_MOUSE	Elongation factor 1-alpha 2 OS=Mus musculus GN=Eef1a2 PE=1 SV=1	LPLQDVYK
p00315	-3.09868	92.6583	-2.5309	0.023174	0.193052	-3.23357	EF1G_MOUSE	Elongation factor 1-gamma OS=Mus musculus GN=Eef1g PE=1 SV=3	ALIAAQYSGAQVR
p06134	-5.47746	101.589	-3.86808	0.00125048	0.158725	-0.840456	EF2_MOUSE	Elongation factor 2 OS=Mus musculus GN=Eef2 PE=1 SV=2	VFSGVVSTGLK
p02820	-6.73345	77.9726	-2.68055	0.021597	0.193052	-3.18031	EF2_MOUSE	Elongation factor 2 OS=Mus musculus GN=Eef2 PE=1 SV=2	KEDLYLKPIQR
p06367	-2.18443	105.168	-2.1577	0.0427636	0.224108	-3.90212	EF2_MOUSE	Elongation factor 2 OS=Mus musculus GN=Eef2 PE=1 SV=2	VNFTVDQIR
p03798	-3.81234	92.122	-3.22893	0.0241747	0.193052	-3.01434	EFHD2_MOUSE	EF-hand domain-containing protein D2 OS=Mus musculus GN=Efhd2 PE=1 SV=1	LSEIDVSTEGVK
p03618	-3.67675	95.5904	-3.06763	0.00530362	0.179252	-2.10939	ENOA_MOUSE	Alpha-enolase OS=Mus musculus GN=Eno1 PE=1 SV=3	LMIEMDGTENK
p02405	-3.29383	67.2574	-2.50531	0.0191547	0.183988	-3.24867	ENOA_MOUSE	Alpha-enolase OS=Mus musculus GN=Eno1 PE=1 SV=3	IGAEVYHNLK
p01016	-7.04595	99.74	-2.6493	0.0213835	0.193052	-3.18072	ENOA_MOUSE	Alpha-enolase OS=Mus musculus GN=Eno1 PE=1 SV=3	EALELLK
p02133	-2.37495	51.1375	-2.11197	0.0490406	0.23232	-3.99594	ENOA_MOUSE	Alpha-enolase OS=Mus musculus GN=Eno1 PE=1 SV=3	GVSQAVEHINK
p06653	-3.60828	96.1053	-3.82381	0.000877656	0.158725	-0.548119	ENOG_MOUSE	Gamma-enolase OS=Mus musculus GN=Eno2 PE=1 SV=2	YDLDFK
p01238	-2.82702	92.9998	-2.58492	0.0182277	0.18312	-3.11984	ENPL_MOUSE	Endoplasmin OS=Mus musculus GN=Hsp90b1 PE=1 SV=2	ELISNASDALDK
p05559	-2.14024	70.7607	-2.41957	0.0239013	0.193052	-3.42524	EPCR_MOUSE	Endothelial protein C receptor OS=Mus musculus GN=Procr PE=1 SV=3	TAVWVSGSQEPSK
p01997	-3.76146	111.725	-2.38976	0.0263815	0.199849	-3.49612	EPIPL_MOUSE	Epiplakin OS=Mus musculus GN=Eppk1 PE=1 SV=2	GLVGLELK
p02129	-1.81219	74.0077	-2.30032	0.030102	0.206261	-3.63008	FKB1A_MOUSE	Peptidyl-prolyl cis-trans isomerase FKBP1A OS=Mus musculus GN=Fkbp1a PE=1 SV=2	GVQVETISPGDGR
p01776	-3.95049	102.03	-3.49216	0.00304635	0.170291	-1.56596	FLNA_MOUSE	Filamin-A OS=Mus musculus GN=Flna PE=1 SV=5	GAGTGGLGLAVEGPSEAK
p06490	-2.27785	77.3869	-2.80382	0.0103836	0.179252	-2.66406	FLNA_MOUSE	Filamin-A OS=Mus musculus GN=Flna PE=1 SV=5	VTAQGPGLEPSGNIANK
p00141	-2.45944	76.2874	-2.69098	0.0125499	0.18029	-2.88758	FLNA_MOUSE	Filamin-A OS=Mus musculus GN=Flna PE=1 SV=5	AFGPGLQGGNAGSPAR
p01002	-4.01208	102.977	-2.74278	0.0159827	0.18159	-2.90193	FLNA_MOUSE	Filamin-A OS=Mus musculus GN=Flna PE=1 SV=5	EAGAGGLAIAVEGPSK
p03901	-2.61403	102.973	-2.60836	0.0178585	0.183115	-3.13687	FLNA_MOUSE	Filamin-A OS=Mus musculus GN=Flna PE=1 SV=5	LTVSSLQESGLK
p06076	-2.23963	79.759	-2.5462	0.0184574	0.18312	-3.19892	FLNA_MOUSE	Filamin-A OS=Mus musculus GN=Flna PE=1 SV=5	VEPGLGADNSVVR
p01640	-4.32562	153.839	-2.68374	0.0232049	0.193052	-3.12939	FLNA_MOUSE	Filamin-A OS=Mus musculus GN=Flna PE=1 SV=5	FNEEHIPDSPFVVPVASPSGDAR
p00616	-3.11789	122.932	-2.20846	0.0496452	0.232433	-3.7349	FLNB_MOUSE	Filamin-B OS=Mus musculus GN=Flnb PE=1 SV=3	DAGEGLLAVQITDQEGKPQR
p01763	-3.07285	76.4592	-2.99211	0.00786654	0.179252	-2.39469	G3P_MOUSE	Glyceraldehyde-3-phosphate dehydrogenase OS=Mus musculus GN=Gapdh PE=1 SV=2	GAAQNIIPASTGAAK
p06215	-4.02775	68.4228	-2.59584	0.0498006	0.232433	-3.54913	G3P_MOUSE	Glyceraldehyde-3-phosphate dehydrogenase OS=Mus musculus GN=Gapdh PE=1 SV=2	VIPELNGK
p03993	-3.27229	61.3318	-2.96724	0.00914443	0.179252	-2.48806	GDIA_MOUSE	Rab GDP dissociation inhibitor alpha OS=Mus musculus GN=Gdi1 PE=1 SV=3	LYSESLAR
p05571	-4.47737	91.1296	-3.37305	0.00341656	0.171109	-1.74296	GDIR1_MOUSE	Rho GDP-dissociation inhibitor 1 OS=Mus musculus GN=Arhgdia PE=1 SV=3	TDYMVGSYGPR
p00901	-3.12865	55.8112	-2.57406	0.0197957	0.186502	-3.09538	GELS_MOUSE	Gelsolin OS=Mus musculus GN=Gsn PE=1 SV=3	DSQEEEKTEALTSAK
p02970	-5.3355	134.095	-2.40165	0.0435832	0.2242	-3.59726	GLRX1_MOUSE	Glutaredoxin-1 OS=Mus musculus GN=Glrx PE=1 SV=3	KTQEILSQLPFK
p00587	-2.83813	68.8972	-2.64041	0.0153481	0.18159	-3.03338	GPNMB_MOUSE	Transmembrane glycoprotein NMB OS=Mus musculus GN=Gpnmb PE=1 SV=2	AYIPISK
p04449	-3.45163	104.347	-3.49851	0.00398348	0.171109	-1.74725	GRP78_MOUSE	78 kDa glucose-regulated protein OS=Mus musculus GN=Hspa5 PE=1 SV=3	NQLTSNPENTVFDAK
p02725	-3.33011	39.7424	-2.77912	0.032822	0.206261	-3.27885	GRP78_MOUSE	78 kDa glucose-regulated protein OS=Mus musculus GN=Hspa5 PE=1 SV=3	ITITNDQNR
p00065	-3.94078	89.4941	-3.16945	0.00640877	0.179252	-2.20494	GSTM1_MOUSE	Glutathione S-transferase Mu 1 OS=Mus musculus GN=Gstm1 PE=1 SV=2	ADIVENQVMDTR
p06698	-3.70752	111.451	-2.41917	0.0424167	0.223065	-3.5493	GSTM1_MOUSE	Glutathione S-transferase Mu 1 OS=Mus musculus GN=Gstm1 PE=1 SV=2	YIATPIFSK
p02052	-1.99845	72.0823	-2.36205	0.0313031	0.206261	-3.59767	GSTO1_MOUSE	Glutathione S-transferase omega-1 OS=Mus musculus GN=Gsto1 PE=1 SV=2	GSAPPGPVPEGQIR
p04155	-4.48819	106.34	-3.26708	0.0141165	0.18159	-2.67516	GSTP2_MOUSE	Glutathione S-transferase P 2 OS=Mus musculus GN=Gstp2 PE=1 SV=2	MLLADQGQSWK
p00472	-5.25601	100.433	-2.28444	0.0415796	0.221401	-3.61225	H12_MOUSE	Histone H1.2 OS=Mus musculus GN=Hist1h1c PE=1 SV=2	ASGPPVSELITK
p00263	-3.70967	71.8877	-3.13548	0.014205	0.18159	-2.71206	H1T_MOUSE	Histone H1t OS=Mus musculus GN=Hist1h1t PE=1 SV=4	ALAAAGYDVEK
p03550	-3.27825	120.764	-2.15365	0.0415869	0.221401	-3.83608	H2B3B_MOUSE	Histone H2B type 3-B OS=Mus musculus GN=Hist3h2bb PE=1 SV=3	LLLPGELAK
p06120	-2.83722	127.923	-2.09803	0.0476831	0.230053	-3.99801	H4_MOUSE	Histone H4 OS=Mus musculus GN=Hist1h4a PE=1 SV=2	VFLENVIR
p02415	-3.125	77.1122	-2.80311	0.0114	0.179252	-2.75293	HBA_MOUSE	Hemoglobin subunit alpha OS=Mus musculus GN=Hba PE=1 SV=2	IGGHGAEYGAEALER
p05079	-4.90365	66.8535	-4.31673	0.00201305	0.158725	-1.14482	HCLS1_MOUSE	Hematopoietic lineage cell-specific protein OS=Mus musculus GN=Hcls1 PE=1 SV=2	SAVGHEYVADVEK
p05577	-6.34882	65.0939	-3.0657	0.0121134	0.18029	-2.64354	HCLS1_MOUSE	Hematopoietic lineage cell-specific protein OS=Mus musculus GN=Hcls1 PE=1 SV=2	TEHINIHQLR
p05871	-2.08377	54.2796	-2.19747	0.0400195	0.218999	-3.78335	HCLS1_MOUSE	Hematopoietic lineage cell-specific protein OS=Mus musculus GN=Hcls1 PE=1 SV=2	TTPIEAASSGAR
p04097	-3.73873	160.676	-3.13504	0.0268028	0.200373	-3.08847	HNRPC_MOUSE	Heterogeneous nuclear ribonucleoproteins C1/C2 OS=Mus musculus GN=Hnrnpc PE=1 SV=1	MIAGQVLDINLAAEPK
p04482	-4.19161	78.6374	-3.71861	0.00232693	0.158725	-1.317	HNRPK_MOUSE	Heterogeneous nuclear ribonucleoprotein K OS=Mus musculus GN=Hnrnpk PE=1 SV=1	NTDEMVELR
p02076	-2.73103	154.768	-2.40249	0.047983	0.230053	-3.63554	HNRPK_MOUSE	Heterogeneous nuclear ribonucleoprotein K OS=Mus musculus GN=Hnrnpk PE=1 SV=1	GSYGDLGGPIITTQVTIPK
p00100	-1.7558	72.6068	-2.20284	0.0389888	0.218586	-3.82503	HPT_MOUSE	Haptoglobin OS=Mus musculus GN=Hp PE=1 SV=1	AEGDGVYTLNDEK
p05873	-2.01744	103.749	-2.1845	0.0385689	0.218513	-3.83667	HS71B_MOUSE	Heat shock 70 kDa protein 1B OS=Mus musculus GN=Hspa1b PE=1 SV=3	TTPSYVAFTDTER
p05448	-2.45852	67.8461	-2.83019	0.00952075	0.179252	-2.63653	HSP72_MOUSE	Heat shock-related 70 kDa protein 2 OS=Mus musculus GN=Hspa2 PE=1 SV=2	STAGDTHLGGEDFDNR
p04935	-3.41241	79.2971	-3.22599	0.00407552	0.171109	-1.87683	HSP7C_MOUSE	Heat shock cognate 71 kDa protein OS=Mus musculus GN=Hspa8 PE=1 SV=1	RFDDAVVQSDMK
p05388	-4.23679	97.5811	-2.94731	0.00687427	0.179252	-2.36814	HSP7C_MOUSE	Heat shock cognate 71 kDa protein OS=Mus musculus GN=Hspa8 PE=1 SV=1	SQIHDIVLVGGSTR
p02087	-4.19462	46.3654	-2.85002	0.0174754	0.183115	-2.91865	HSP7C_MOUSE	Heat shock cognate 71 kDa protein OS=Mus musculus GN=Hspa8 PE=1 SV=1	GTLDPVEK
p04936	-3.5299	78.3422	-2.52628	0.0359402	0.211231	-3.41984	HSP7C_MOUSE	Heat shock cognate 71 kDa protein OS=Mus musculus GN=Hspa8 PE=1 SV=1	RFDDAVVQSDMK
p03094	-6.32664	104.929	-3.78341	0.00553463	0.179252	-2.00388	HYAS1_MOUSE	Hyaluronan synthase 1 OS=Mus musculus GN=Has1 PE=1 SV=1	LAVEALVR
p06185	-4.94785	158.266	-3.00501	0.0245392	0.195034	-3.04963	IF5A2_MOUSE	Eukaryotic translation initiation factor 5A-2 OS=Mus musculus GN=Eif5a2 PE=1 SV=3	VHLVGIDIFTGK
p04440	-4.39427	166.207	-2.71446	0.0432893	0.2242	-3.44286	IFIT2_MOUSE	Interferon-induced protein with tetratricopeptide repeats 2 OS=Mus musculus GN=Ifit2 PE=1 SV=1	NQAMALVEEALK
p03795	-2.05686	60.6365	-2.40543	0.0272129	0.200373	-3.4358	IFIT3_MOUSE	Interferon-induced protein with tetratricopeptide repeats 3 OS=Mus musculus GN=Ifit3 PE=1 SV=1	LSEAQAYVDK
p04924	-5.82886	112.444	-2.46457	0.0497494	0.232433	-3.64439	IMDH2_MOUSE	Inosine-5'-monophosphate dehydrogenase 2 OS=Mus musculus GN=Impdh2 PE=1 SV=2	REDLVVAPAGVTLK
p02593	-3.02394	62.1543	-2.09968	0.0460726	0.226786	-3.98353	IN80B_MOUSE		INLQLR
p03408	-4.07357	150.808	-3.44434	0.0191804	0.183988	-2.85126	INAR2_MOUSE	Interferon alpha/beta receptor 2 OS=Mus musculus GN=Ifnar2 PE=1 SV=2	LILSWELENK
p05312	-3.1592	123.467	-2.67165	0.0325136	0.206261	-3.32268	IPO5_MOUSE	Importin-5 OS=Mus musculus GN=Ipo5 PE=1 SV=3	SLVEIADTVPK
p05337	-3.93438	156.548	-2.26395	0.0389806	0.218586	-3.59762	IQGA1_MOUSE	Ras GTPase-activating-like protein IQGAP1 OS=Mus musculus GN=Iqgap1 PE=1 SV=2	SNQQLENDLNLMDIK
p06294	-6.12356	93.0765	-4.14877	0.00632847	0.179252	-2.19824	IREB2_MOUSE	Iron-responsive element-binding protein 2 OS=Mus musculus GN=Ireb2 PE=1 SV=2	VLLEAAVR
p00293	-2.06228	77.7488	-2.40683	0.0295624	0.206261	-3.53646	K1C10_MOUSE	Keratin, type I cytoskeletal 10 OS=Mus musculus GN=Krt10 PE=1 SV=3	ALEESNYELEGK
p03215	-2.21032	68.9328	-2.30532	0.0371421	0.212585	-3.68429	K1C10_MOUSE	Keratin, type I cytoskeletal 10 OS=Mus musculus GN=Krt10 PE=1 SV=3	LENEIQTYR
p02734	-3.19166	69.0846	-2.62278	0.0239309	0.193052	-3.1719	K1C13_MOUSE	Keratin, type I cytoskeletal 13 OS=Mus musculus GN=Krt13 PE=1 SV=2	ITMQNLNDR
p03084	-2.49317	56.3493	-2.46981	0.0261346	0.199849	-3.42334	K1C15_MOUSE	Keratin, type I cytoskeletal 15 OS=Mus musculus GN=Krt15 PE=1 SV=2	LASYLDK
p04850	-5.40285	72.8746	-3.50665	0.00578251	0.179252	-2.07152	K1C18_MOUSE	Keratin, type I cytoskeletal 18 OS=Mus musculus GN=Krt18 PE=1 SV=5	QSVESDIHGLR
p03154	-2.79152	81.7654	-2.87725	0.0115982	0.179252	-2.68912	K1C18_MOUSE	Keratin, type I cytoskeletal 18 OS=Mus musculus GN=Krt18 PE=1 SV=5	LEAEIATYR
p02452	-3.44246	62.5793	-3.60858	0.0117056	0.179252	-2.44944	K1C18_MOUSE	Keratin, type I cytoskeletal 18 OS=Mus musculus GN=Krt18 PE=1 SV=5	IIEDLR
p03006	-3.57119	40.3647	-2.50563	0.0278282	0.201231	-3.30471	K1C18_MOUSE	Keratin, type I cytoskeletal 18 OS=Mus musculus GN=Krt18 PE=1 SV=5	KVVDDTNITR
p04849	-5.04432	71.9217	-2.4466	0.0309932	0.206261	-3.42127	K1C18_MOUSE	Keratin, type I cytoskeletal 18 OS=Mus musculus GN=Krt18 PE=1 SV=5	QSVESDIHGLR
p01395	-2.13667	49.4644	-2.31494	0.037795	0.215586	-3.60844	K1C18_MOUSE	Keratin, type I cytoskeletal 18 OS=Mus musculus GN=Krt18 PE=1 SV=5	ETMQDLNDR
p00298	-2.88935	75.7227	-3.07166	0.00782086	0.179252	-2.35028	K1C19_MOUSE	Keratin, type I cytoskeletal 19 OS=Mus musculus GN=Krt19 PE=1 SV=1	ALEQANGELEVK
p02770	-2.95454	92.135	-2.55108	0.0214588	0.193052	-3.27286	K1C19_MOUSE	Keratin, type I cytoskeletal 19 OS=Mus musculus GN=Krt19 PE=1 SV=1	IVLQIDNAR
p05280	-6.80407	107.196	-3.66237	0.0228765	0.193052	-3.22167	K1C19_MOUSE	Keratin, type I cytoskeletal 19 OS=Mus musculus GN=Krt19 PE=1 SV=1	SLLEGQEAHYNNLPTPK
p05770	-3.31559	94.5996	-3.06302	0.00643962	0.179252	-2.25027	K2C1_MOUSE	Keratin, type II cytoskeletal 1 OS=Mus musculus GN=Krt1 PE=1 SV=4	TNAENEFVTIK
p04375	-2.33376	42.6885	-2.51187	0.0240598	0.193052	-3.35874	K2C5_MOUSE	Keratin, type II cytoskeletal 5 OS=Mus musculus GN=Krt5 PE=1 SV=1	NKYEDEINKR
p01606	-2.99541	90.3256	-2.75794	0.0147466	0.18159	-2.89496	K2C73_MOUSE	Keratin, type II cytoskeletal 73 OS=Mus musculus GN=Krt73 PE=1 SV=1	FLEQQNQVLQTK
p00479	-2.97741	124.012	-3.0761	0.00894014	0.179252	-2.41592	K2C8_MOUSE	Keratin, type II cytoskeletal 8 OS=Mus musculus GN=Krt8 PE=1 SV=4	ASLEAAIADAEQR
p00083	-2.84441	76.5293	-2.71838	0.0167635	0.183115	-2.98589	K2C8_MOUSE	Keratin, type II cytoskeletal 8 OS=Mus musculus GN=Krt8 PE=1 SV=4	AEAETMYQIK
p05579	-3.9469	42.7134	-2.37362	0.0420693	0.223065	-3.58794	K2C8_MOUSE	Keratin, type II cytoskeletal 8 OS=Mus musculus GN=Krt8 PE=1 SV=4	TEISEMNR
p01975	-3.11865	115.754	-2.22528	0.0409258	0.220684	-3.76418	KATL2_MOUSE	Katanin p60 ATPase-containing subunit A-like 2 OS=Mus musculus GN=Katnal2 PE=2 SV=2	GLLLYGPPGTGK
p01821	-5.48083	88.3518	-3.63712	0.00224544	0.158725	-1.40589	KPYM_MOUSE	Pyruvate kinase PKM OS=Mus musculus GN=Pkm PE=1 SV=4	GDYPLEAVR
p02727	-2.7169	97.572	-2.73134	0.0116722	0.179252	-2.81915	KPYM_MOUSE	Pyruvate kinase PKM OS=Mus musculus GN=Pkm PE=1 SV=4	ITLDNAYMEK
p03118	-2.44775	100.758	-2.59838	0.0155194	0.18159	-3.0694	KPYM_MOUSE	Pyruvate kinase PKM OS=Mus musculus GN=Pkm PE=1 SV=4	LDIDSAPITAR
p00400	-2.98742	73.6645	-2.55517	0.0171187	0.183115	-3.15306	KPYM_MOUSE	Pyruvate kinase PKM OS=Mus musculus GN=Pkm PE=1 SV=4	APIIAVTR
p02726	-1.89146	79.6089	-2.32585	0.0357258	0.211231	-3.60836	KPYM_MOUSE	Pyruvate kinase PKM OS=Mus musculus GN=Pkm PE=1 SV=4	ITLDNAYMEK	Oxidation (M)
p03015	-2.71782	62.5285	-2.80882	0.0140432	0.18159	-2.83441	KRT35_MOUSE		LAADDFR
p03381	-4.04813	91.9953	-2.94023	0.0115964	0.179252	-2.63222	KSYK_MOUSE	Tyrosine-protein kinase SYK OS=Mus musculus GN=Syk PE=1 SV=2	LIATTAHEK
p01875	-3.36569	120.216	-2.16514	0.0497789	0.232433	-3.75212	LASP1_MOUSE	LIM and SH3 domain protein 1 OS=Mus musculus GN=Lasp1 PE=1 SV=1	GFSVVADTPELQR
p04898	-2.45961	102.487	-2.42491	0.0240321	0.193052	-3.42369	LDHA_MOUSE	L-lactate dehydrogenase A chain OS=Mus musculus GN=Ldha PE=1 SV=3	QVVDSAYEVIK
p05295	-3.00399	97.6938	-2.38053	0.0286362	0.203975	-3.49073	LDHA_MOUSE	L-lactate dehydrogenase A chain OS=Mus musculus GN=Ldha PE=1 SV=3	SLNPELGTDADKEQWK
p06504	-1.93738	62.5968	-2.18936	0.0381739	0.217009	-3.82813	LDHA_MOUSE	L-lactate dehydrogenase A chain OS=Mus musculus GN=Ldha PE=1 SV=3	VTLTPEEEAR
p03928	-3.5397	88.5775	-2.49656	0.0232041	0.193052	-3.25581	LDHC_MOUSE	L-lactate dehydrogenase C chain OS=Mus musculus GN=Ldhc PE=1 SV=2	LVIITAGAR
p03670	-2.46707	52.3501	-2.24855	0.0336523	0.209018	-3.72326	LEG1_MOUSE	Galectin-1 OS=Mus musculus GN=Lgals1 PE=1 SV=3	LPDGHEFK
p02007	-6.69476	92.9872	-3.44358	0.00274479	0.158725	-1.57984	LEG3_MOUSE	Galectin-3 OS=Mus musculus GN=Lgals3 PE=1 SV=3	GNDVAFHFNPR
p05998	-5.58638	86.0566	-2.40319	0.0400911	0.218999	-3.55573	LEG3_MOUSE	Galectin-3 OS=Mus musculus GN=Lgals3 PE=1 SV=3	VAVNDAHLLQYNHR
p02662	-3.02703	110.627	-2.16099	0.0405299	0.219963	-3.87776	LEG3_MOUSE	Galectin-3 OS=Mus musculus GN=Lgals3 PE=1 SV=3	IQVLVEADHFK
p05765	-4.97194	158.838	-3.66966	0.00824896	0.179252	-2.17803	LG3BP_MOUSE	Galectin-3-binding protein OS=Mus musculus GN=Lgals3bp PE=1 SV=1	TMQALEFHTVPVEVLAK
p04957	-4.44656	74.2695	-3.1068	0.00842948	0.179252	-2.3752	LG3BP_MOUSE	Galectin-3-binding protein OS=Mus musculus GN=Lgals3bp PE=1 SV=1	RIEVSMSSVK
p04467	-5.04272	89.4272	-4.0592	0.00104583	0.158725	-0.672679	LMNA_MOUSE	Prelamin-A/C OS=Mus musculus GN=Lmna PE=1 SV=2	NSNLVGAAHEELQQSR
p04779	-5.09759	91.2037	-3.49533	0.00510408	0.179252	-1.98675	LMNA_MOUSE	Prelamin-A/C OS=Mus musculus GN=Lmna PE=1 SV=2	QNGDDPLMTYR
p05538	-3.0984	101.229	-2.76402	0.0128472	0.18029	-2.81373	LMNA_MOUSE	Prelamin-A/C OS=Mus musculus GN=Lmna PE=1 SV=2	TALINSTGEEVAMR
p00052	-2.11498	70.726	-2.68123	0.0140282	0.18159	-2.95597	LMNA_MOUSE	Prelamin-A/C OS=Mus musculus GN=Lmna PE=1 SV=2	AAYEAELGDAR
p04370	-3.13524	76.8388	-2.67009	0.0184195	0.18312	-3.03138	LMNA_MOUSE	Prelamin-A/C OS=Mus musculus GN=Lmna PE=1 SV=2	NIYSEELR
p01058	-1.90549	64.2148	-2.41548	0.0260345	0.199849	-3.4696	LMNA_MOUSE	Prelamin-A/C OS=Mus musculus GN=Lmna PE=1 SV=2	EDLQELNDR
p05262	-2.16373	58.52	-2.29984	0.0305138	0.206261	-3.63658	LMNA_MOUSE	Prelamin-A/C OS=Mus musculus GN=Lmna PE=1 SV=2	SLETENAGLR
p04214	-3.30505	166.934	-2.37432	0.0454684	0.226786	-3.60227	LMNA_MOUSE	Prelamin-A/C OS=Mus musculus GN=Lmna PE=1 SV=2	MQQQLDEYQELLDIK
p01826	-3.38875	46.7507	-2.67646	0.0234949	0.193052	-3.14002	MARCS_MOUSE	Myristoylated alanine-rich C-kinase substrate OS=Mus musculus GN=Marcks PE=1 SV=2	GEATAERPGEAAVASSPSK
p03370	-4.00894	60.2519	-2.42297	0.0421681	0.223065	-3.53964	MDHC_MOUSE	Malate dehydrogenase, cytoplasmic OS=Mus musculus GN=Mdh1 PE=1 SV=3	LGVTADDVK
p06391	-2.88262	79.0093	-2.33476	0.0287049	0.203975	-3.57989	MDHM_MOUSE	Malate dehydrogenase, mitochondrial OS=Mus musculus GN=Mdh2 PE=1 SV=3	VNVPVIGGHAGK
p02635	-2.13121	47.7792	-2.26891	0.0446765	0.22567	-3.68471	MDHM_MOUSE	Malate dehydrogenase, mitochondrial OS=Mus musculus GN=Mdh2 PE=1 SV=3	IQEAGTEVVK
p02431	-4.97218	89.845	-2.54867	0.0444633	0.22567	-3.5669	MGN2_MOUSE	Protein mago nashi homolog 2 OS=Mus musculus GN=Magohb PE=2 SV=1	IGSLIDVNQSK
p00354	-2.97461	75.1194	-2.72808	0.011517	0.179252	-2.81381	MOES_MOUSE	Moesin OS=Mus musculus GN=Msn PE=1 SV=3	ALTSELANAR
p00434	-2.52802	64.8694	-2.58	0.0161816	0.18159	-3.10507	MOES_MOUSE	Moesin OS=Mus musculus GN=Msn PE=1 SV=3	AQMVQEDLEK
p02703	-3.11494	66.0825	-2.46731	0.0239588	0.193052	-3.32956	MOES_MOUSE	Moesin OS=Mus musculus GN=Msn PE=1 SV=3	ISQLEMAR
p01144	-3.41623	73.8148	-2.72613	0.0185632	0.18312	-3.0095	MYL3_MOUSE	Myosin light chain 3 OS=Mus musculus GN=Myl3 PE=1 SV=4	EGNGTVMGAELR
p02263	-7.3313	68.9479	-3.03312	0.00970734	0.179252	-2.50483	MYL6_MOUSE	Myosin light polypeptide 6 OS=Mus musculus GN=Myl6 PE=1 SV=3	HVLVTLGEK
p01142	-3.41623	73.8148	-2.72613	0.0185632	0.18312	-3.0095	MYL6_MOUSE	Myosin light polypeptide 6 OS=Mus musculus GN=Myl6 PE=1 SV=3	EGNGTVMGAEIR
p01996	-3.85147	111.701	-2.40498	0.0255423	0.199849	-3.4687	NDKA_MOUSE	Nucleoside diphosphate kinase A OS=Mus musculus GN=Nme1 PE=1 SV=1	GLVGEIIK
p05609	-3.4951	94.275	-2.63184	0.0156397	0.18159	-3.04957	NDKB_MOUSE	Nucleoside diphosphate kinase B OS=Mus musculus GN=Nme2 PE=1 SV=1	TFIAIKPDGVQR
p04354	-2.46029	55.4624	-2.29505	0.0312463	0.206261	-3.65121	NDKB_MOUSE	Nucleoside diphosphate kinase B OS=Mus musculus GN=Nme2 PE=1 SV=1	NIIHGSDSVESAEK
p00219	-6.04788	103.193	-4.79025	0.00103039	0.158725	-0.604633	NEXN_MOUSE		AIDLEIK
p01575	-3.94926	68.8249	-2.80881	0.0149053	0.18159	-2.83943	NPM_MOUSE	Nucleophosmin OS=Mus musculus GN=Npm1 PE=1 SV=1	FINYVK
p06389	-3.1024	67.5055	-3.13641	0.00736016	0.179252	-2.28133	NUCB1_MOUSE	Nucleobindin-1 OS=Mus musculus GN=Nucb1 PE=1 SV=2	VNVPGSQAQLK
p06732	-2.61106	76.148	-2.94645	0.00802005	0.179252	-2.46234	NUCB1_MOUSE	Nucleobindin-1 OS=Mus musculus GN=Nucb1 PE=1 SV=2	YLESLGEEQR
p04940	-3.51237	62.9036	-2.73339	0.0124975	0.18029	-2.85628	NUCB1_MOUSE	Nucleobindin-1 OS=Mus musculus GN=Nucb1 PE=1 SV=2	RFEEELAAR
p03836	-1.88344	54.1369	-2.40157	0.0309315	0.206261	-3.5114	NUCB1_MOUSE	Nucleobindin-1 OS=Mus musculus GN=Nucb1 PE=1 SV=2	LSQETEALGR
p01992	-1.96854	70.369	-2.14534	0.0477575	0.230053	-3.95626	NUCL_MOUSE	Nucleolin OS=Mus musculus GN=Ncl PE=1 SV=2	GLSEDTTEETLK
p00136	-6.06403	101.017	-5.21817	0.00130664	0.158725	-0.82639	PA2G4_MOUSE	Proliferation-associated protein 2G4 OS=Mus musculus GN=Pa2g4 PE=1 SV=3	AFFSEVER
p05188	-5.07333	108.664	-3.16036	0.0163402	0.18159	-2.75141	PABP1_MOUSE	Polyadenylate-binding protein 1 OS=Mus musculus GN=Pabpc1 PE=1 SV=2	SGVGNIFIK
p05973	-2.93649	72.2484	-2.94325	0.00807774	0.179252	-2.46379	PAFA_MOUSE	Platelet-activating factor acetylhydrolase OS=Mus musculus GN=Pla2g7 PE=2 SV=2	VAIDLTNK
p03996	-2.07246	64.1517	-2.4918	0.0221939	0.193052	-3.31672	PAFA_MOUSE	Platelet-activating factor acetylhydrolase OS=Mus musculus GN=Pla2g7 PE=2 SV=2	LYYPAQDQGR
p00345	-4.10205	131.051	-2.46486	0.0395206	0.218999	-3.51278	PAFA_MOUSE	Platelet-activating factor acetylhydrolase OS=Mus musculus GN=Pla2g7 PE=2 SV=2	ALSAILDIEHGDPK
p01484	-7.20212	104.945	-3.97623	0.00422774	0.171109	-1.81763	PDIA3_MOUSE	Protein disulfide-isomerase A3 OS=Mus musculus GN=Pdia3 PE=1 SV=2	FAHTNIESLVK
p01743	-3.918	105.401	-3.21017	0.0127078	0.18029	-2.58275	PDIA3_MOUSE	Protein disulfide-isomerase A3 OS=Mus musculus GN=Pdia3 PE=1 SV=2	FVMQEEFSR
p03066	-2.41746	63.8209	-2.40951	0.0304658	0.206261	-3.47551	PDIA3_MOUSE	Protein disulfide-isomerase A3 OS=Mus musculus GN=Pdia3 PE=1 SV=2	LAPEYEAAATR
p03677	-6.06177	104.33	-3.26381	0.0325844	0.206261	-3.38875	PDILT_MOUSE		LPENPLLK
p01696	-3.91421	123.974	-2.45188	0.0323895	0.206261	-3.40392	PGAM1_MOUSE	Phosphoglycerate mutase 1 OS=Mus musculus GN=Pgam1 PE=1 SV=3	FSGWYDADLSPAGHEEAK
p06284	-7.41988	66.2407	-4.98291	0.00829759	0.179252	-2.4359	PGAM2_MOUSE	Phosphoglycerate mutase 2 OS=Mus musculus GN=Pgam2 PE=1 SV=3	VLIAAHGNSLR
p02645	-3.09753	132.855	-2.65243	0.0168369	0.183115	-3.03306	PGK1_MOUSE	Phosphoglycerate kinase 1 OS=Mus musculus GN=Pgk1 PE=1 SV=4	IQLINNMLDK
p01679	-4.42425	111.652	-3.11118	0.0112162	0.179252	-2.54503	PLD4_MOUSE	Phospholipase D4 OS=Mus musculus GN=Pld4 PE=1 SV=1	FQQLLLR
p00418	-2.79042	75.8713	-2.95303	0.00995022	0.179252	-2.55747	PLEC_MOUSE	Plectin OS=Mus musculus GN=Plec PE=1 SV=3	AQAELEAQELQR
p00207	-4.32107	52.1646	-3.04833	0.0102364	0.179252	-2.53067	PLEC_MOUSE	Plectin OS=Mus musculus GN=Plec PE=1 SV=3	AGVVGPELHEK
p04751	-4.49707	67.1962	-2.95008	0.0147393	0.18159	-2.78072	PLEC_MOUSE	Plectin OS=Mus musculus GN=Plec PE=1 SV=3	QLQLAQEAAQK
p06798	-3.54863	146.329	-2.82711	0.0154075	0.18159	-2.84919	PLEC_MOUSE	Plectin OS=Mus musculus GN=Plec PE=1 SV=3	YSELTTLTSQYIK
p01884	-2.37928	71.9054	-2.60463	0.0179991	0.183115	-3.09998	PLEC_MOUSE	Plectin OS=Mus musculus GN=Plec PE=1 SV=3	GGELVYTDTEAR
p04977	-3.14376	34.4116	-2.6895	0.0187042	0.183432	-3.06275	PLEC_MOUSE	Plectin OS=Mus musculus GN=Plec PE=1 SV=3	RLEEQAALHK
p04546	-2.6613	72.2093	-2.53792	0.019197	0.183988	-3.22534	PLEC_MOUSE	Plectin OS=Mus musculus GN=Plec PE=1 SV=3	QAEAELALR
p06231	-3.61898	136.727	-2.65143	0.0213	0.193052	-3.09771	PLEC_MOUSE	Plectin OS=Mus musculus GN=Plec PE=1 SV=3	VIYQSLEGAVQAGQLK
p04704	-2.07962	68.0526	-2.52093	0.0228019	0.193052	-3.32531	PLEC_MOUSE	Plectin OS=Mus musculus GN=Plec PE=1 SV=3	QLAEEDLAQQR
p04085	-3.50099	106.177	-2.42394	0.0322981	0.206261	-3.46382	PLEC_MOUSE	Plectin OS=Mus musculus GN=Plec PE=1 SV=3	MGIVGPEFK
p04731	-3.68745	101.637	-2.5606	0.0340853	0.210151	-3.37875	PLEC_MOUSE	Plectin OS=Mus musculus GN=Plec PE=1 SV=3	QLLEEELAR
p05203	-3.61602	104.156	-2.36291	0.036083	0.211231	-3.5045	PLEC_MOUSE	Plectin OS=Mus musculus GN=Plec PE=1 SV=3	SILDEELQR
p03749	-3.70953	58.1742	-2.38499	0.0412973	0.221264	-3.54913	PLEC_MOUSE	Plectin OS=Mus musculus GN=Plec PE=1 SV=3	LQLETTER
p05393	-2.63606	128.89	-2.16328	0.0472324	0.229191	-3.87861	PLEC_MOUSE	Plectin OS=Mus musculus GN=Plec PE=1 SV=3	SQVEEELFSVR
p04634	-4.00789	93.2279	-2.98922	0.0092465	0.179252	-2.47438	PLSL_MOUSE	Plastin-2 OS=Mus musculus GN=Lcp1 PE=1 SV=4	QFVTATDVVR
p06575	-2.85368	147.978	-2.24582	0.0346818	0.211231	-3.68285	PLSL_MOUSE	Plastin-2 OS=Mus musculus GN=Lcp1 PE=1 SV=4	VYALPEDLVEVNPK
p02594	-18.89	83.1363	-3.09055	0.0179958	0.183115	-2.86154	PLST_MOUSE	Plastin-3 OS=Mus musculus GN=Pls3 PE=1 SV=3	INNFSADIK
p02127	-4.13692	178.026	-2.74589	0.0129059	0.18029	-2.79244	PLTP_MOUSE	Phospholipid transfer protein OS=Mus musculus GN=Pltp PE=1 SV=1	GVQIPLPEGINFVR
p00542	-2.29507	63.5672	-2.62842	0.0176953	0.183115	-3.05652	PLTP_MOUSE	Phospholipid transfer protein OS=Mus musculus GN=Pltp PE=1 SV=1	AVEPQLEDDER
p01657	-2.49737	94.7757	-2.57543	0.0163507	0.18159	-3.11393	PNPH_MOUSE	Purine nucleoside phosphorylase OS=Mus musculus GN=Pnp PE=1 SV=2	FPAMSDAYDR
p03918	-4.02662	148.636	-2.5576	0.0204772	0.190299	-3.19898	PNPH_MOUSE	Purine nucleoside phosphorylase OS=Mus musculus GN=Pnp PE=1 SV=2	LVFGLLNGR
p05601	-2.55244	69.5592	-2.48015	0.0247469	0.195758	-3.34811	PPIA_MOUSE	Peptidyl-prolyl cis-trans isomerase A OS=Mus musculus GN=Ppia PE=1 SV=2	TEWLDGK
p03495	-3.44246	62.5793	-3.60858	0.0117056	0.179252	-2.44944	PR8A9_MOUSE		LLEDLR
p00057	-2.71868	70.8432	-3.08611	0.00492453	0.179252	-2.0782	PRDX1_MOUSE	Peroxiredoxin-1 OS=Mus musculus GN=Prdx1 PE=1 SV=1	ADEGISFR
p05485	-3.00351	68.0252	-2.76166	0.0108847	0.179252	-2.759	PRDX1_MOUSE	Peroxiredoxin-1 OS=Mus musculus GN=Prdx1 PE=1 SV=1	SVDEIIR
p00512	-2.45271	80.9276	-2.62818	0.0144987	0.18159	-3.01125	PRDX1_MOUSE	Peroxiredoxin-1 OS=Mus musculus GN=Prdx1 PE=1 SV=1	ATAVMPDGQFK
p00511	-1.88668	56.8855	-2.13615	0.0431305	0.2242	-3.9248	PRDX1_MOUSE	Peroxiredoxin-1 OS=Mus musculus GN=Prdx1 PE=1 SV=1	ATAVMPDGQFK	Oxidation (M)
p03465	-3.48008	107.931	-3.11239	0.00719878	0.179252	-2.26664	PRDX5_MOUSE	Peroxiredoxin-5, mitochondrial OS=Mus musculus GN=Prdx5 PE=1 SV=2	LLADPTGAFGK
p06537	-3.44991	141.407	-2.96811	0.016013	0.18159	-2.80695	PRDX6_MOUSE	Peroxiredoxin-6 OS=Mus musculus GN=Prdx6 PE=1 SV=3	VVDSLQLTGTKPVATPVDWK
p06544	-3.28597	137.499	-2.3493	0.0330625	0.206888	-3.58055	PRDX6_MOUSE	Peroxiredoxin-6 OS=Mus musculus GN=Prdx6 PE=1 SV=3	VVFIFGPDK
p01151	-3.28418	41.3389	-2.37301	0.030632	0.206261	-3.52261	PROF1_MOUSE	Profilin-1 OS=Mus musculus GN=Pfn1 PE=1 SV=2	EGVHGGLINK
p05459	-2.62889	102.494	-2.24209	0.0359562	0.211231	-3.63933	PROF1_MOUSE	Profilin-1 OS=Mus musculus GN=Pfn1 PE=1 SV=2	STGGAPTFNVTVTMTAK	Oxidation (M)
p04721	-5.62475	102.051	-2.63084	0.0221215	0.193052	-3.20266	RADI_MOUSE	Radixin OS=Mus musculus GN=Rdx PE=1 SV=3	QLFDQVVK
p00297	-2.30883	61.6324	-2.33344	0.0280134	0.201624	-3.56978	RADI_MOUSE	Radixin OS=Mus musculus GN=Rdx PE=1 SV=3	ALELEQER
p03937	-3.13699	74.7114	-2.64505	0.0177396	0.183115	-3.02536	RAN_MOUSE	GTP-binding nuclear protein Ran OS=Mus musculus GN=Ran PE=1 SV=3	LVLVGDGGTGK
p06558	-5.38848	89.4426	-2.66471	0.0328394	0.206261	-3.40833	RB11B_MOUSE	Ras-related protein Rab-11B OS=Mus musculus GN=Rab11b PE=1 SV=3	VVLIGDSGVGK
p03662	-2.97984	130.236	-2.71435	0.0357214	0.211231	-3.34363	RBBP7_MOUSE	Histone-binding protein RBBP7 OS=Mus musculus GN=Rbbp7 PE=1 SV=1	LNVWDLSK
p05357	-3.82583	67.371	-3.00498	0.0150904	0.18159	-2.77208	RENR_MOUSE	Renin receptor OS=Mus musculus GN=Atp6ap2 PE=1 SV=2	SPGSVVFR
p01970	-3.02394	62.1543	-2.09968	0.0460726	0.226786	-3.98353	RIF1_MOUSE	Telomere-associated protein RIF1 OS=Mus musculus GN=Rif1 PE=1 SV=2	GLGQLIR
p02596	-3.02394	62.1543	-2.09968	0.0460726	0.226786	-3.98353	RL7L_MOUSE		INQLIR
p05837	-5.60565	175.949	-2.73916	0.0295189	0.206261	-3.33184	RLA0_MOUSE	60S acidic ribosomal protein P0 OS=Mus musculus GN=Rplp0 PE=1 SV=3	TSFFQALGITTK
p03515	-3.72269	159.577	-2.22638	0.039103	0.218586	-3.74418	RN180_MOUSE	E3 ubiquitin-protein ligase RNF180 OS=Mus musculus GN=Rnf180 PE=1 SV=2	LLFKASDPK
p02368	-2.63936	103.63	-2.22785	0.0398018	0.218999	-3.69367	ROA3_MOUSE	Heterogeneous nuclear ribonucleoprotein A3 OS=Mus musculus GN=Hnrnpa3 PE=1 SV=1	IETIEVMEDR
p06311	-5.98115	113.285	-5.62832	0.00145398	0.158725	-1.1432	RS19_MOUSE	40S ribosomal protein S19 OS=Mus musculus GN=Rps19 PE=1 SV=3	VLQALEGLK
p04083	-2.69923	76.2051	-3.18641	0.00446687	0.174208	-1.96054	RS21_MOUSE	40S ribosomal protein S21 OS=Mus musculus GN=Rps21 PE=1 SV=1	MGESDDSILR
p00111	-4.13065	115.244	-2.90724	0.0456871	0.226786	-3.43856	RS3_MOUSE	40S ribosomal protein S3 OS=Mus musculus GN=Rps3 PE=1 SV=1	AELNEFLTR
p01473	-1.86185	74.3618	-2.12508	0.0446079	0.22567	-3.94794	RSSA_MOUSE	40S ribosomal protein SA OS=Mus musculus GN=Rpsa PE=1 SV=4	FAAATGATPIAGR
p03602	-2.3327	66.2314	-2.37313	0.0260418	0.199849	-3.50333	S10A6_MOUSE	Protein S100-A6 OS=Mus musculus GN=S100a6 PE=1 SV=3	LMDDLDR
p00077	-3.42583	90.5408	-3.40337	0.00269524	0.158725	-1.51707	SAA3_MOUSE	Serum amyloid A-3 protein OS=Mus musculus GN=Saa3 PE=1 SV=1	ADQFANEWGR
p00850	-4.31196	71.7913	-2.67241	0.0286923	0.203975	-3.24819	SAA3_MOUSE	Serum amyloid A-3 protein OS=Mus musculus GN=Saa3 PE=1 SV=1	DPNHFRPAGLPK
p02612	22.4765	65.8878	16.8966	1.66094e-05	0.013927	-0.354011	SAP_MOUSE	Prosaposin OS=Mus musculus GN=Psap PE=1 SV=2	IPEVDMAR	Oxidation (M)
p02613	-2.50759	77.2033	-2.53785	0.0191997	0.183988	-3.22546	SAP_MOUSE	Prosaposin OS=Mus musculus GN=Psap PE=1 SV=2	IPEVDMAR
p03544	-3.10218	65.8235	-2.28594	0.0363601	0.211231	-3.7178	SAP_MOUSE	Prosaposin OS=Mus musculus GN=Psap PE=1 SV=2	LLLGTEK
p06370	-4.89958	137.865	-3.08576	0.0221551	0.193052	-2.98213	SEPT8_MOUSE	Septin-8 OS=Mus musculus GN=Sept8 PE=1 SV=4	VNIIPIIAK
p06581	-2.0262	67.9941	-2.12721	0.0435047	0.2242	-3.93629	SH3L1_MOUSE	SH3 domain-binding glutamic acid-rich-like protein OS=Mus musculus GN=Sh3bgrl PE=1 SV=1	VYIASSSGSTAIK
p04428	-4.2755	93.7555	-3.69742	0.00218045	0.158725	-1.2797	SHPS1_MOUSE	Tyrosine-protein phosphatase non-receptor type substrate 1 OS=Mus musculus GN=Sirpa PE=1 SV=1	NNMDFSIR
p00347	-4.99249	91.9076	-3.63922	0.00464633	0.177088	-1.89922	SNX2_MOUSE	Sorting nexin-2 OS=Mus musculus GN=Snx2 PE=1 SV=2	ALSQLAEVEEK
p00707	-1.63271	76.3144	-2.26812	0.0352619	0.211231	-3.71913	SODC_MOUSE	Superoxide dismutase [Cu-Zn] OS=Mus musculus GN=Sod1 PE=1 SV=2	DGVANVSIEDR
p02261	-2.4019	54.4635	-2.17744	0.0405246	0.219963	-3.86308	SODC_MOUSE	Superoxide dismutase [Cu-Zn] OS=Mus musculus GN=Sod1 PE=1 SV=2	HVGDLGNVTAGK
p02097	-2.66762	126.557	-2.48367	0.0238225	0.193052	-3.32676	SPB6_MOUSE	Serpin B6 OS=Mus musculus GN=Serpinb6 PE=1 SV=1	GTTASQMAQALALDK
p04888	-3.02394	62.1543	-2.09968	0.0460726	0.226786	-3.98353	SYNE3_MOUSE		QVQLLR
p04326	-1.8152	59.6537	-2.35964	0.0264559	0.199849	-3.5217	TAGL2_MOUSE	Transgelin-2 OS=Mus musculus GN=Tagln2 PE=1 SV=4	NFSDNQLQEGK
p00949	-3.94385	94.5758	-3.12024	0.00821526	0.179252	-2.34616	TBA3_MOUSE	Tubulin alpha-3 chain OS=Mus musculus GN=Tuba3a PE=1 SV=1	DVNAAIATIK
p01062	-3.20382	54.3704	-2.59373	0.0196867	0.186502	-3.08307	TBA4A_MOUSE	Tubulin alpha-4A chain OS=Mus musculus GN=Tuba4a PE=1 SV=1	EDMAALEK
p01660	-2.898	106.178	-2.92352	0.00815652	0.179252	-2.48633	TBB1_MOUSE	Tubulin beta-1 chain OS=Mus musculus GN=Tubb1 PE=1 SV=1	FPGQLNADLR
p02713	-2.4724	79.5513	-2.2385	0.0435206	0.2242	-3.72353	TBB5_MOUSE	Tubulin beta-5 chain OS=Mus musculus GN=Tubb5 PE=1 SV=1	ISVYYNEATGGK
p03095	-6.32664	104.929	-3.78341	0.00553463	0.179252	-2.00388	TCPB_MOUSE	T-complex protein 1 subunit beta OS=Mus musculus GN=Cct2 PE=1 SV=4	LAVEAVLR
p03940	-4.11424	104.833	-2.66547	0.0221833	0.193052	-3.11322	TCPQ_MOUSE	T-complex protein 1 subunit theta OS=Mus musculus GN=Cct8 PE=1 SV=3	LVPGGGATEIELAK
p05943	-5.04706	78.9891	-2.82336	0.0496194	0.232433	-3.58624	TCPQ_MOUSE	T-complex protein 1 subunit theta OS=Mus musculus GN=Cct8 PE=1 SV=3	VADIALHYANK
p02847	-7.77575	90.4411	-4.36114	0.0014655	0.158725	-0.880507	TERA_MOUSE	Transitional endoplasmic reticulum ATPase OS=Mus musculus GN=Vcp PE=1 SV=4	KGDIFLVR
p01922	-3.11865	115.754	-2.22528	0.0409258	0.220684	-3.76418	TERA_MOUSE	Transitional endoplasmic reticulum ATPase OS=Mus musculus GN=Vcp PE=1 SV=4	GILLYGPPGTGK
p06588	-2.88294	107.911	-2.20104	0.0439632	0.225462	-3.7554	TERA_MOUSE	Transitional endoplasmic reticulum ATPase OS=Mus musculus GN=Vcp PE=1 SV=4	WALSQSNPSALR
p03409	-3.10218	65.4601	-2.3608	0.0323326	0.206261	-3.60608	TITIN_MOUSE	Titin OS=Mus musculus GN=Ttn PE=1 SV=1	LILTEGK
p02446	-4.12963	70.7149	-3.39265	0.00375559	0.171109	-1.73951	TKT_MOUSE	Transketolase OS=Mus musculus GN=Tkt PE=1 SV=1	IIALDGDTK
p03098	-2.57655	64.0028	-2.43306	0.0236131	0.193052	-3.40166	TKT_MOUSE	Transketolase OS=Mus musculus GN=Tkt PE=1 SV=1	LAVSQVPR
p02507	-3.04038	139.902	-2.53749	0.0278388	0.201231	-3.28885	TKT_MOUSE	Transketolase OS=Mus musculus GN=Tkt PE=1 SV=1	ILATPPQEDAPSVDIANIR
p02875	-2.91125	57.2454	-2.24925	0.0390613	0.218586	-3.66974	TKT_MOUSE	Transketolase OS=Mus musculus GN=Tkt PE=1 SV=1	KISSDLDGHPVPK
p03464	-4.40194	162.299	-3.25066	0.00886576	0.179252	-2.35547	TLN1_MOUSE	Talin-1 OS=Mus musculus GN=Tln1 PE=1 SV=2	LLAALLEDEGGNGRPLLQAAK
p02259	-4.26355	92.923	-2.65759	0.017293	0.183115	-3.00437	TPIS_MOUSE	Triosephosphate isomerase OS=Mus musculus GN=Tpi1 PE=1 SV=4	HVFGESDELIGQK
p04963	-6.46774	105.223	-4.03478	0.00389985	0.171109	-1.66257	TPM2_MOUSE	Tropomyosin beta chain OS=Mus musculus GN=Tpm2 PE=1 SV=1	RIQLVEEELDR
p00011	-2.08266	73.4237	-3.02699	0.00584298	0.179252	-2.22008	TPM3_MOUSE	Tropomyosin alpha-3 chain OS=Mus musculus GN=Tpm3 PE=1 SV=3	AADAEAEVASLNR
p05604	-4.12385	71.691	-3.17194	0.00412915	0.171109	-1.89531	TRI68_MOUSE		TFAVDVR
p01249	-3.43475	145.984	-2.96557	0.0130084	0.18029	-2.68693	U2AF2_MOUSE	Splicing factor U2AF 65 kDa subunit OS=Mus musculus GN=U2af2 PE=1 SV=3	ELLTSFGPLK
p06207	-4.65531	92.392	-3.7517	0.00246195	0.158725	-1.321	UB2V2_MOUSE	Ubiquitin-conjugating enzyme E2 variant 2 OS=Mus musculus GN=Ube2v2 PE=1 SV=4	VILQELR
p00121	-2.19778	65.4817	-2.26899	0.03457	0.211231	-3.60191	UBA1_MOUSE	Ubiquitin-like modifier-activating enzyme 1 OS=Mus musculus GN=Uba1 PE=1 SV=1	AENYDISPADR
p05745	-2.61702	66.7183	-3.2142	0.00360475	0.171109	-1.80598	UBC_MOUSE	Polyubiquitin-C OS=Mus musculus GN=Ubc PE=1 SV=2	TLSDYNIQK
p01377	-4.87984	100.137	-2.67058	0.0143619	0.18159	-2.97014	UBC_MOUSE	Polyubiquitin-C OS=Mus musculus GN=Ubc PE=1 SV=2	ESTLHLVLR
p04203	-3.28498	87.792	-2.13473	0.0442444	0.22567	-3.87701	UBC_MOUSE	Polyubiquitin-C OS=Mus musculus GN=Ubc PE=1 SV=2	MQIFVK
p05772	-1.85689	56.109	-2.48118	0.0205391	0.190299	-3.30246	UBE2N_MOUSE	Ubiquitin-conjugating enzyme E2 N OS=Mus musculus GN=Ube2n PE=1 SV=1	TNEAQAIETAR
p06302	-5.30929	91.9197	-4.15433	0.000863248	0.158725	-0.515875	VAT1_MOUSE	Synaptic vesicle membrane protein VAT-1 homolog OS=Mus musculus GN=Vat1 PE=1 SV=3	VLLVPGPEK
p01489	-2.94706	67.6591	-2.93252	0.00712088	0.179252	-2.3987	VIME_MOUSE	Vimentin OS=Mus musculus GN=Vim PE=1 SV=3	FANYIDK
p03720	-2.6095	67.7412	-2.83425	0.00898603	0.179252	-2.59999	VIME_MOUSE	Vimentin OS=Mus musculus GN=Vim PE=1 SV=3	LQDEIQNMK
p01073	-3.86348	89.0068	-2.89556	0.0101186	0.179252	-2.57674	VIME_MOUSE	Vimentin OS=Mus musculus GN=Vim PE=1 SV=3	EEAESTLQSFR
p01477	-2.316	73.5809	-2.69319	0.0124859	0.18029	-2.88319	VIME_MOUSE	Vimentin OS=Mus musculus GN=Vim PE=1 SV=3	FADLSEAANR
p00702	-2.99191	66.9832	-2.91792	0.0141587	0.18159	-2.77078	VIME_MOUSE	Vimentin OS=Mus musculus GN=Vim PE=1 SV=3	DGQVINETSQHHDDLE
p03729	-2.051	66.8218	-2.10815	0.0472868	0.229191	-3.92586	VIME_MOUSE	Vimentin OS=Mus musculus GN=Vim PE=1 SV=3	LQEEMLQR
p00269	-4.14077	101.285	-2.6199	0.0225707	0.193052	-3.14255	VINC_MOUSE	Vinculin OS=Mus musculus GN=Vcl PE=1 SV=4	ALASQLQDSLK
p04237	-2.62025	107.393	-2.40182	0.0336237	0.209018	-3.54505	VINC_MOUSE	Vinculin OS=Mus musculus GN=Vcl PE=1 SV=4	MTGLVDEAIDTK
p05612	-4.60381	70.6922	-2.94684	0.0123493	0.18029	-2.66395	VPS18_MOUSE		TFLSSPR
p02572	-4.10564	106.937	-3.76292	0.00977447	0.179252	-2.39182	VPS35_MOUSE	Vacuolar protein sorting-associated protein 35 OS=Mus musculus GN=Vps35 PE=1 SV=1	ILVGTNLVR
p02298	-2.9287	47.6318	-2.79666	0.0271963	0.200373	-3.16987	WDR1_MOUSE	WD repeat-containing protein 1 OS=Mus musculus GN=Wdr1 PE=1 SV=3	IAVVGEGR
p04343	-3.02394	62.1543	-2.09968	0.0460726	0.226786	-3.98353	ZN329_MOUSE		NIAGLIR
