# Supplementary figures and images for: RAS–p110α signalling in macrophages is required for effective inflammatory response and resolution of inflammation
Source: eLife journal article supplement (doi:10.7554/elife.94590), 2024-04-12

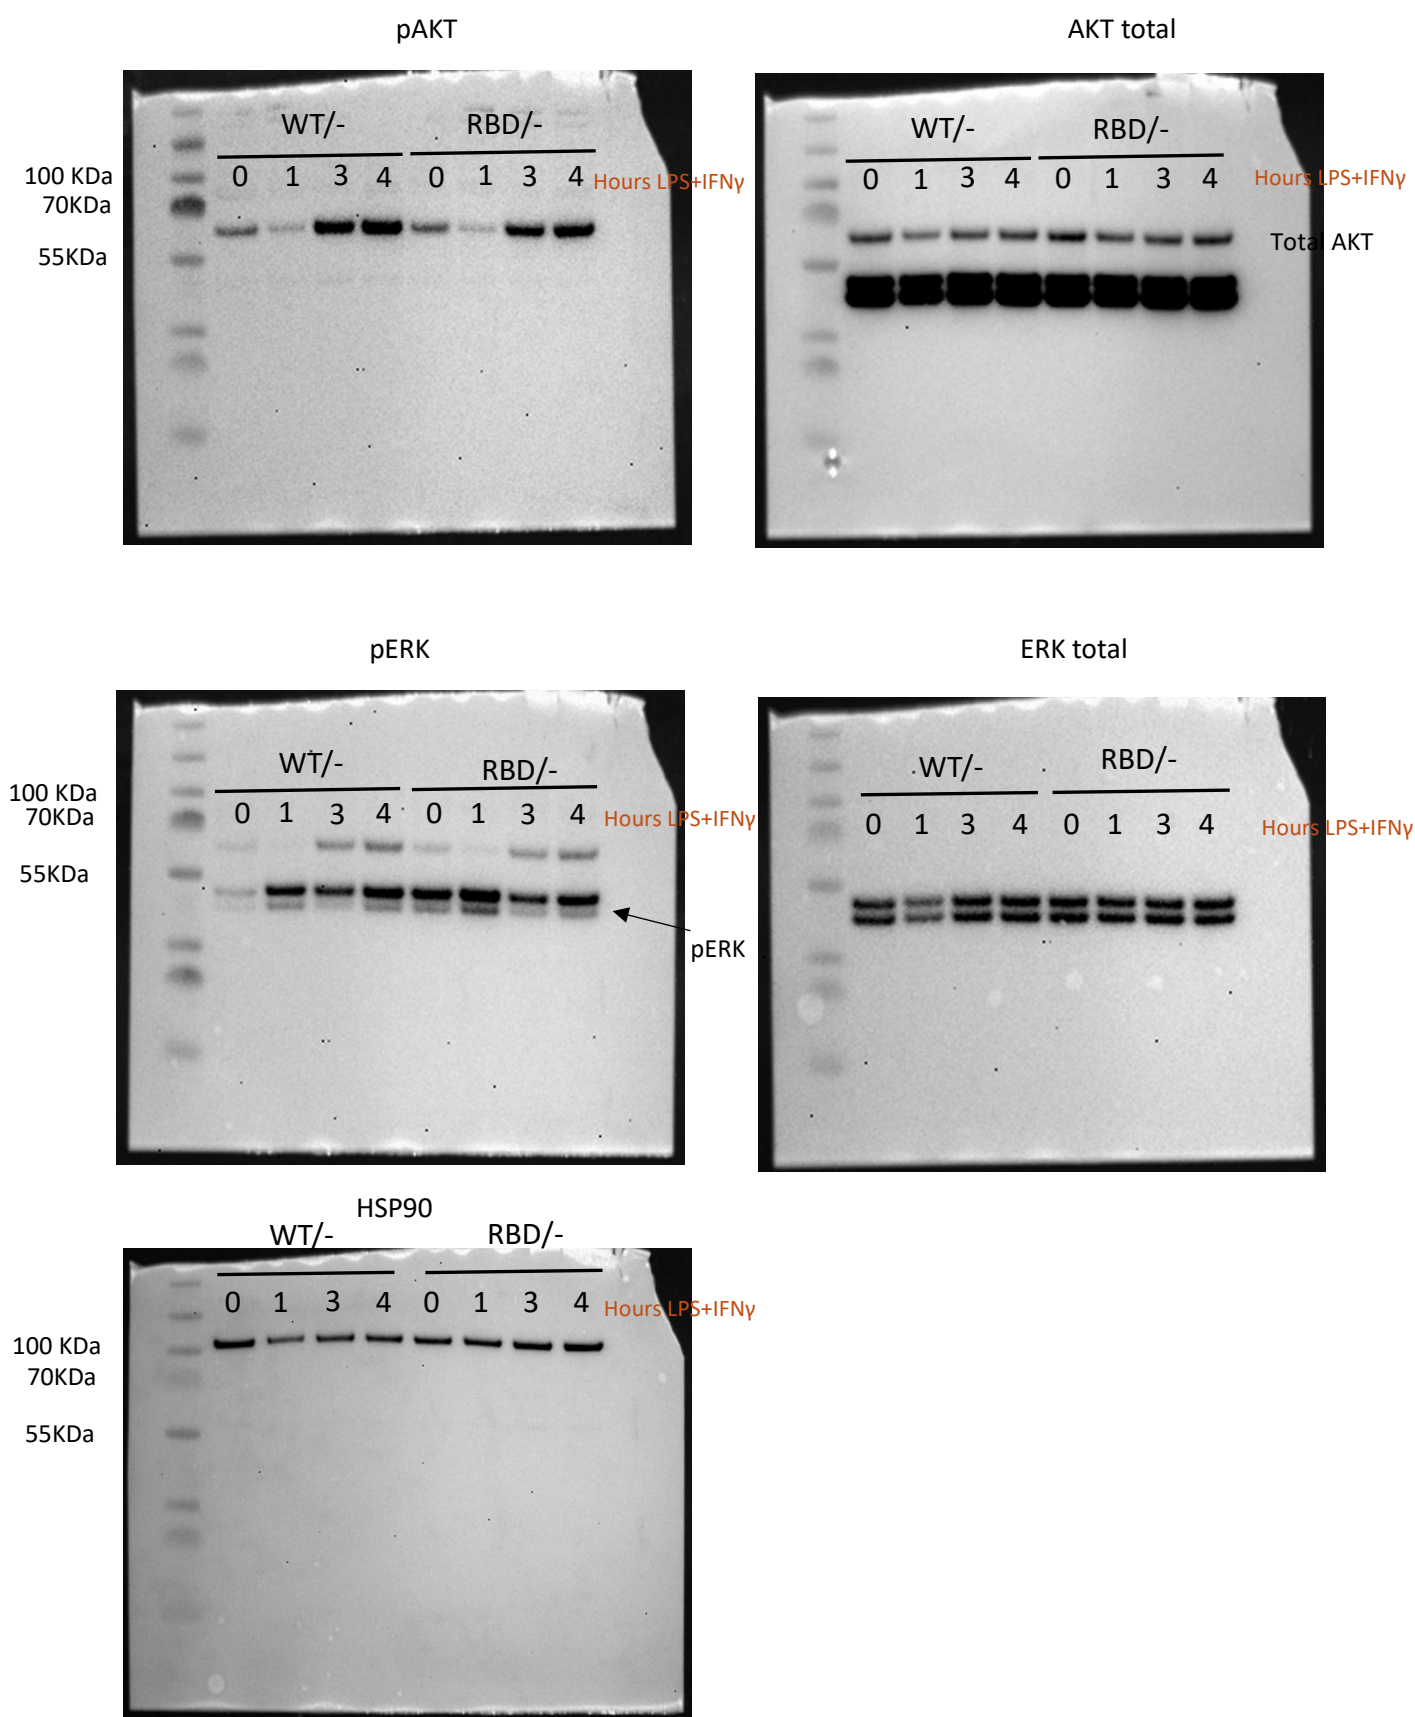

Figure 1A, source data 1: Original membranes corresponding to Figure 1, panel A.

Supplement: fig1-data1 [file elife-94590-fig1-data1-v1.zip]
